# Supplementary material for: Guidelines for Optimizing Type S Nonribosomal Peptide Synthetases
Source: PubMed Central journal article supplement (PMC10443035; doi:10.1021/acssynbio.3c00295), 2023-07-31

# Supporting Information

1  
2  
3  
4  
5  
6  
7  
8  
9  
10  
11  
12  
13  
14  
15  
16  
17  
18  
19

## Guidelines for Optimizing Type S Non-Ribosomal Peptide Synthetases

Nadya Abbood<sup>1,2</sup>, Juliana Effert<sup>1</sup>, Kenan A. J. Bozhueyuek<sup>1,2,3,7\*</sup>, Helge B. Bode<sup>1,2,4,5,6\*</sup>

1 Max-Planck-Institute for Terrestrial Microbiology, Department of Natural Products in Organismic  
2 Interactions, 35043, Marburg, Germany.

3 2 Molecular Biotechnology, Institute of Molecular Biosciences, Goethe University Frankfurt, 60438,  
4 Frankfurt am Main, Germany.

5 3 Myria Biosciences AG, Mattenstrasse 26, 4058 Basel, Switzerland

6 4 Chemical Biology, Department of Chemistry, Philipps-University Marburg, 35043, Marburg,  
7 Germany

8 5 Senckenberg Gesellschaft für Naturforschung, 60325, Frankfurt am Main, Germany

9 6 Center for Synthetic Microbiology (SYNMIKRO), Phillips University Marburg, 35043 Marburg,  
10 Germany

11 7 Present address: Synthetic Biology of Microbial Natural Products, Helmholtz Institute for  
12 Pharmaceutical Research Saarland (HIPS), Helmholtz Centre for Infection Research, Saarland  
13 University Campus, 66123 Saarbrücken, Germany

14 \* Corresponding author: kenan.bozhueyuek@myria.bio; helge.bode@mpi-marburg.mpg.de

|    |                                                                                                                       |    |
|----|-----------------------------------------------------------------------------------------------------------------------|----|
| 20 | 1. Supplementary tables .....                                                                                         | 4  |
| 21 | Table S1. ESI-MS data of all produced peptides. ....                                                                  | 4  |
| 22 | Table S2. Strains used in this work. ....                                                                             | 4  |
| 23 | Table S3. Plasmids used in this work. ....                                                                            | 4  |
| 24 | Table S4. Oligonucleotides used in this work.....                                                                     | 7  |
| 25 | 2. Supplementary Figures.....                                                                                         | 10 |
| 26 | Figure S1. Advantages of Type S NRPS.....                                                                             | 10 |
| 27 | Figure S2. Other splicing positions.....                                                                              | 11 |
| 28 | Figure S3. HPLC/MS data (Figure 2) of compound 1 produced in <i>E. coli</i> DH10B:: <i>mtaA</i> .....                 | 13 |
| 29 | Figure S4. HPLC/MS data (Figure 3) of compounds 1 produced in <i>E. coli</i> DH10B:: <i>taA</i> .....                 | 14 |
| 30 | Figure S5. HPLC/MS data (Figure 4) of compound 1 produced in <i>E. coli</i> DH10B:: <i>mtaA</i> .....                 | 16 |
| 31 | Figure S6. HPLC/MS data (Figure 5) of compound 1 produced in <i>E. coli</i> DH10B:: <i>mtaA</i> .....                 | 16 |
| 32 | Figure S7. HPLC/MS data (Figure 5) of compound 2 produced in <i>E. coli</i> DH10B:: <i>mtaA</i> .....                 | 17 |
| 33 | Figure S8. HPLC/MS data (Figure 5) of compound 2 produced in <i>E. coli</i> DH10B:: <i>mtaA</i> .....                 | 17 |
| 34 | Figure S9. HPLC/MS data (Figure 5) of compound 3 produced in <i>E. coli</i> DH10B:: <i>mtaA</i> .....                 | 17 |
| 35 | Figure S10. HPLC/MS data (Figure 5) of compounds 4 and 5 produced in <i>E. coli</i> DH10B:: <i>mtaA</i> .....         | 18 |
| 36 | Figure S11. HPLC/MS data (Figure 5) of compound 4 produced in <i>E. coli</i> DH10B:: <i>mtaA</i> .....                | 19 |
| 37 | Figure S12. HPLC/MS data (Figure 5) of compounds 1 and 6 produced in <i>E. coli</i> DH10B:: <i>mtaA</i> .....         | 19 |
| 38 | Figure S13. HPLC/MS data (Figure 5) of compounds 2, 7 and 8 produced in <i>E. coli</i> DH10B:: <i>mtaA</i> .....      | 20 |
| 39 | Figure S14. HPLC/MS data (Figure 5) of compounds 2, 8, 9 and 10 produced in <i>E. coli</i> DH10B:: <i>mtaA</i> .....  | 21 |
| 40 | .....                                                                                                                 |    |
| 41 | Figure S15. HPLC/MS data (Figure 5) of compounds 3 and 11 produced in <i>E. coli</i> DH10B:: <i>mtaA</i> .....        | 22 |
| 42 | Figure S16. HPLC/MS data (Figure 5) of compounds 4, 12, 5 and 13 produced in <i>E. coli</i> DH10B:: <i>mtaA</i> ..... | 23 |
| 43 | .....                                                                                                                 |    |
| 44 | Figure S17. HPLC/MS data (Figure 5) of compounds 4 and 12 produced in <i>E. coli</i> DH10B:: <i>mtaA</i> .....        | 24 |
| 45 | Figure S18. HPLC/MS data (Figure 6) of compound 14 produced in <i>E. coli</i> DH10B:: <i>mtaA</i> .....               | 24 |
| 46 | Figure S19. HPLC/MS data (Figure 5) of compounds 14, 15, 16, 17 and 18 produced in <i>E. coli</i>                     |    |
| 47 | DH10B:: <i>mtaA</i> .....                                                                                             | 26 |
| 48 | Figure S20. HPLC/MS data (Figure S25) of compound 1 produced in <i>E. coli</i> DH10B:: <i>mtaA</i> .....              | 28 |
| 49 | Figure S21. HPLC/MS data (Figure S26) of compound 1 produced in <i>E. coli</i> DH10B:: <i>mtaA</i> .....              | 28 |
| 50 | Figure S22. HPLC/MS data (Figure S27) of compound 1 produced in <i>E. coli</i> DH10B:: <i>mtaA</i> .....              | 30 |
| 51 | Figure S23. HPLC/MS data (Figure S28) of compound 1 produced in <i>E. coli</i> DH10B:: <i>mtaA</i> .....              | 33 |
| 52 | Figure S24. HPLC/MS data (Figure S29) of compound 1 produced in <i>E. coli</i> DH10B:: <i>mtaA</i> .....              | 34 |
| 53 | Figure S25. More GS-optimized chimeric tri-partite XtpS NRPSs split at the A-T position. ....                         | 36 |
| 54 | Figure S26. SZ1:2 truncation of chimeric di-partite XtpS NRPSs split at the A-T position. ....                        | 36 |
| 55 | Figure S27. SZ2:19 truncation of chimeric di-partite XtpS NRPSs split at the A-T position. ....                       | 38 |
| 56 | Figure S28. SZ17:18 truncation of chimeric di-partite XtpS NRPSs split at the C-A position.....                       | 40 |
| 57 | Figure S29. SZ4:21 truncation of chimeric di-partite XtpS NRPSs split at the A-T position. ....                       | 41 |

58 Figure S30. Overview of truncated SYNZIPs..... 43  
59 3. References .....43

60  
61  
62  
63  
64  
65  
66  
67  
68  
69  
70  
71  
72  
73  
74  
75  
76  
77  
78  
79  
80  
81  
82  
83  
84  
85  
86  
87

88 **1. Supplementary tables**

89 **Table S1.** ESI-MS data of all produced peptides.

| Peptide (#) | mass-to-charge ratio ( <i>m/z</i> ) | Molecular formula                                             | AA sequence  | Reference  |
|-------------|-------------------------------------|---------------------------------------------------------------|--------------|------------|
| 1           | 411.29                              | C <sub>21</sub> H <sub>38</sub> O <sub>4</sub> N <sub>4</sub> | cyclo(vLvV)  | 1          |
| 2           | 459,30                              | C <sub>25</sub> H <sub>38</sub> N <sub>4</sub> O <sub>4</sub> | cylco(vLVV)  | 2          |
| 3           | 778,45                              | C <sub>41</sub> H <sub>59</sub> N <sub>7</sub> O <sub>8</sub> | vLvVYW       | 2          |
| 4           | 826.45                              | C <sub>45</sub> H <sub>59</sub> N <sub>7</sub> O <sub>8</sub> | vLfvYW       | 2          |
| 5           | 792.47                              | C <sub>42</sub> H <sub>61</sub> N <sub>7</sub> O <sub>8</sub> | vLlvYW       | 2          |
| 6           | 425.31                              | C <sub>22</sub> H <sub>40</sub> N <sub>4</sub> O <sub>4</sub> | cyclo(lLvV)  | 2          |
| 7           | 425,31                              | C <sub>22</sub> H <sub>40</sub> N <sub>4</sub> O <sub>4</sub> | cyclo(vLVV)  | 2          |
| 8           | 472.31                              | C <sub>26</sub> H <sub>40</sub> N <sub>4</sub> O <sub>4</sub> | cyclo(lLVV)  | 2          |
| 9           | 476.62                              | C <sub>25</sub> H <sub>40</sub> N <sub>4</sub> O <sub>5</sub> | vLVV         | 2          |
| 10          | 490.65                              | C <sub>26</sub> H <sub>42</sub> N <sub>4</sub> O <sub>5</sub> | lLVV         | 2          |
| 11          | 792.47                              | C <sub>42</sub> H <sub>61</sub> N <sub>7</sub> O <sub>8</sub> | lLvVYW       | 2          |
| 12          | 840.47                              | C <sub>46</sub> H <sub>61</sub> N <sub>7</sub> O <sub>8</sub> | lLfvYW       | 2          |
| 13          | 806.48                              | C <sub>43</sub> H <sub>63</sub> N <sub>7</sub> O <sub>8</sub> | lLlvYW       | 2          |
| 14          | 538.40                              | C <sub>28</sub> H <sub>51</sub> O <sub>5</sub> N <sub>5</sub> | cyclo(vLvL)  | 2          |
| 15          | 470.35                              | C <sub>24</sub> H <sub>46</sub> O <sub>5</sub> N <sub>4</sub> | vllL         | this study |
| 16          | 655.47                              | C <sub>33</sub> H <sub>62</sub> O <sub>7</sub> N <sub>6</sub> | vLVvL        | this study |
| 17          | 637.46                              | C <sub>33</sub> H <sub>60</sub> O <sub>6</sub> N <sub>6</sub> | cyclo(vLVvL) | this study |
| 18          | 754.54                              | C <sub>38</sub> H <sub>71</sub> O <sub>8</sub> N <sub>7</sub> | vLVVvL       | this study |

90

91 **Table S2.** Strains used in this work.

| Strain                             | Genotype/ NRPS                                                                                                                                                         | Reference |
|------------------------------------|------------------------------------------------------------------------------------------------------------------------------------------------------------------------|-----------|
| <i>E. coli</i> DH10B               | F_mcrA ( <i>mrr-hsdRMS-mcrBC</i> ),<br>80 <i>lacZΔ</i> , M15, Δ <i>lacX74 recA1</i><br><i>endA1 araD 139Δ(ara, leu)7697</i><br><i>galU galK λ rpsL (Strr) nupG / -</i> | 3         |
| <i>E. coli</i> DH10B:: <i>mtaA</i> | DH10B with <i>mtaA</i> from<br>pCK_mtaAΔ <i>entD / -</i>                                                                                                               | 4         |
| <i>P. luminescens</i> TTO1         | - / <i>gxpS</i>                                                                                                                                                        | DSMZ      |
| <i>X. nematophila</i> ATCC 19061   | - / <i>xtpS</i>                                                                                                                                                        | ATCC      |
| <i>X. szentirmai</i> DSM 16338     | - / <i>szeS</i>                                                                                                                                                        | DSMZ      |

92

93 **Table S3.** Plasmids used in this work.

| Plasmids               | Genotype                                                                     | Reference   |
|------------------------|------------------------------------------------------------------------------|-------------|
| pCOLA_ara/ <i>tacl</i> | ori ColA, kan <sup>R</sup> , <i>araC-P<sub>BAD</sub></i> and <i>tacl</i>     | unpublished |
| pCK_0402               | ori p15A, cm <sup>R</sup> , <i>araC-P<sub>BAD</sub></i> and <i>tacl-araE</i> | 5           |

|                        |                                                                                                                                                                                                                                     |            |
|------------------------|-------------------------------------------------------------------------------------------------------------------------------------------------------------------------------------------------------------------------------------|------------|
| pCOLA_ara_xtpS_tacl_JW | ori ColA, kan <sup>R</sup> , <i>araC-P<sub>BAD</sub> xtpS</i> and <i>tacl</i>                                                                                                                                                       | 5          |
| pCOLA_ara_gxpS_tacl_JW | ori ColA, kan <sup>R</sup> , <i>araC-P<sub>BAD</sub> gxpS</i> and <i>tacl</i>                                                                                                                                                       | 5          |
| pNA2                   | ori p15A, cm <sup>R</sup> , <i>araC-P<sub>BAD</sub> xtpS_ A<sub>1</sub>T<sub>1</sub>C/E<sub>2</sub>A<sub>2</sub>T<sub>2</sub>-SYNZIP17</i> und <i>tacl-araE</i>                                                                     | 2          |
| pNA3                   | ori ColA, kan <sup>R</sup> , <i>araC-P<sub>BAD</sub> SYNZIP18-xtpS_ C<sub>3</sub>A<sub>3</sub>T<sub>3</sub>C/E<sub>4</sub>A<sub>4</sub>T<sub>4</sub>TE</i> und <i>tacl</i>                                                          | 2          |
| pNA4                   | ori p15A, cm <sup>R</sup> , <i>araC-P<sub>BAD</sub> xtpS_ A<sub>1</sub>T<sub>1</sub>C/E<sub>2</sub>A<sub>2</sub>-SYNZIP17</i> und <i>tacl-araE</i>                                                                                  | 2          |
| pNA5                   | ori ColA, kan <sup>R</sup> , <i>araC-P<sub>BAD</sub> SYNZIP18-xtpS_ T<sub>2</sub>C<sub>3</sub>A<sub>3</sub>T<sub>3</sub>C/E<sub>4</sub>A<sub>4</sub>T<sub>4</sub>TE</i> und <i>tacl</i>                                             | 2          |
| pNA8                   | ori p15A, cm <sup>R</sup> , <i>araC-P<sub>BAD</sub> xtpS_ A<sub>1</sub>T<sub>1</sub>C/E<sub>2</sub>A<sub>2</sub>T<sub>2</sub>C<sub>3</sub>-(GS)<sub>5</sub>-SYNZIP17</i> und <i>tacl-araE</i>                                       | this study |
| pNA9                   | ori p15A, cm <sup>R</sup> , <i>araC-P<sub>BAD</sub> xtpS_ A<sub>1</sub>T<sub>1</sub>C/E<sub>2</sub>A<sub>2</sub>T<sub>2</sub>C<sub>3</sub>-(GS)<sub>4</sub>-SYNZIP17</i> und <i>tacl-araE</i>                                       | this study |
| pNA10                  | ori p15A, cm <sup>R</sup> , <i>araC-P<sub>BAD</sub> xtpS_ A<sub>1</sub>T<sub>1</sub>C/E<sub>2</sub>A<sub>2</sub>T<sub>2</sub>C<sub>3</sub>-(GS)<sub>2</sub>-SYNZIP17</i> und <i>tacl-araE</i>                                       | this study |
| pNA15                  | ori ColA, kan <sup>R</sup> , <i>araC-P<sub>BAD</sub> SYNZIP18-xtpS_ T<sub>2</sub>C<sub>3</sub>A<sub>3</sub>-SYNZIP1</i> und <i>tacl</i>                                                                                             | 2          |
| pNA16                  | ori CloDF13, spec <sup>R</sup> , <i>araC-P<sub>BAD</sub> SYNZIP2-xtpS_ T<sub>3</sub>C/E<sub>4</sub>A<sub>4</sub>T<sub>4</sub>TE</i> und <i>tacl</i>                                                                                 | 2          |
| pNA17                  | ori ColA, kan <sup>R</sup> , <i>araC-P<sub>BAD</sub> SYNZIP18-xtpS_ C<sub>3</sub>A<sub>3</sub>T<sub>4</sub>-SYNZIP1</i> und <i>tacl</i>                                                                                             | 2          |
| pNA18                  | ori CloDF13, spec <sup>R</sup> , <i>araC-P<sub>BAD</sub> SYNZIP2-xtpS_ C/E<sub>4</sub>A<sub>4</sub>T<sub>4</sub>TE</i> und <i>tacl</i>                                                                                              | 2          |
| pNA26                  | ori p15A, cm <sup>R</sup> , <i>araC-P<sub>BAD</sub> gxpS_ A<sub>1</sub>T<sub>1</sub>C/E<sub>2</sub>A<sub>2</sub>-SYNZIP17</i> und <i>tacl-araE</i>                                                                                  | 2          |
| pNA27                  | ori ColA, kan <sup>R</sup> , <i>araC-P<sub>BAD</sub> SYNZIP18-gxpS_ T<sub>2</sub>C<sub>3</sub>A<sub>3</sub>-SYNZIP1</i> und <i>tacl</i>                                                                                             | 2          |
| pNA30                  | ori ColA, kan <sup>R</sup> , <i>araC-P<sub>BAD</sub> SYNZIP18-szeS_ T<sub>2</sub>C<sub>3</sub>A<sub>3</sub>-SYNZIP1</i> und <i>tacl</i>                                                                                             | 2          |
| pNA31                  | ori CloDF13, spec <sup>R</sup> , <i>araC-P<sub>BAD</sub> SYNZIP2-szeS_ T<sub>3</sub>C/E<sub>4</sub>A<sub>4</sub>T<sub>4</sub>C/E<sub>5</sub>A<sub>5</sub>T<sub>5</sub>C<sub>6</sub>A<sub>6</sub>T<sub>6</sub>TE</i> und <i>tacl</i> | 2          |
| pNA40                  | ori p15A, cm <sup>R</sup> , <i>araC-P<sub>BAD</sub> xtpS_ A<sub>1</sub>T<sub>1</sub>C/E<sub>2</sub>A<sub>2</sub>-SYNZIP2</i> und <i>tacl-araE</i>                                                                                   | this study |
| pNA41                  | ori ColA, kan <sup>R</sup> , <i>araC-P<sub>BAD</sub> SYNZIP19-xtpS_ T<sub>2</sub>C<sub>3</sub>A<sub>3</sub>T<sub>3</sub>C/E<sub>4</sub>A<sub>4</sub>T<sub>4</sub>TE</i> und <i>tacl</i>                                             | this study |
| pNA42                  | ori p15A, cm <sup>R</sup> , <i>araC-P<sub>BAD</sub> xtpS_ A<sub>1</sub>T<sub>1</sub>C/E<sub>2</sub>A<sub>2</sub>-SYNZIP21</i> und <i>tacl-araE</i>                                                                                  | this study |
| pNA43                  | ori ColA, kan <sup>R</sup> , <i>araC-P<sub>BAD</sub> SYNZIP4-xtpS_ T<sub>2</sub>C<sub>3</sub>A<sub>3</sub>T<sub>3</sub>C/E<sub>4</sub>A<sub>4</sub>T<sub>4</sub>TE</i> und <i>tacl</i>                                              | this study |
| pNA72                  | ori p15A, cm <sup>R</sup> , <i>araC-P<sub>BAD</sub> xtpS_ A<sub>1</sub>T<sub>1</sub>C/E<sub>2</sub>A<sub>2</sub>-N-terminally truncated SYNZIP2 (-9 AA)</i> und <i>tacl-araE</i>                                                    | this study |
| pNA73                  | ori ColA, kan <sup>R</sup> , <i>araC-P<sub>BAD</sub> N-terminally truncated SYNZIP19 (-2 AA)-xtpS_ T<sub>2</sub>C<sub>3</sub>A<sub>3</sub>T<sub>3</sub>C/E<sub>4</sub>A<sub>4</sub>T<sub>4</sub>TE</i> und <i>tacl</i>              | this study |
| pNA145                 | ori p15A, cm <sup>R</sup> , <i>araC-P<sub>BAD</sub> xtpS_ A<sub>1</sub>T<sub>1</sub>C/E<sub>2</sub>A<sub>2</sub>T<sub>2</sub>C<sub>3</sub>-N-terminally truncated SYNZIP17 (-7 AA)</i> und <i>tacl-araE</i>                         | this study |
| pNA146                 | ori ColA, kan <sup>R</sup> , <i>araC-P<sub>BAD</sub> N-terminally truncated SYNZIP18 (-7 AA)-xtpS_ A<sub>3</sub>T<sub>3</sub>C/E<sub>4</sub>A<sub>4</sub>T<sub>4</sub>TE</i> und <i>tacl</i>                                        | this study |
| pNA147                 | ori p15A, cm <sup>R</sup> , <i>araC-P<sub>BAD</sub> xtpS_ A<sub>1</sub>T<sub>1</sub>C/E<sub>2</sub>A<sub>2</sub>T<sub>2</sub>C<sub>3</sub>- N-terminally truncated SYNZIP17 (-14 AA)</i> und <i>tacl-araE</i>                       | this study |
| pNA148                 | ori ColA, kan <sup>R</sup> , <i>araC-P<sub>BAD</sub> N-terminally truncated SYNZIP18 (-14 AA)-xtpS_ A<sub>3</sub>T<sub>3</sub>C/E<sub>4</sub>A<sub>4</sub>T<sub>4</sub>TE</i> und <i>tacl</i>                                       | this study |

|        |                                                                                                                                                                                                                                                                                                    |            |
|--------|----------------------------------------------------------------------------------------------------------------------------------------------------------------------------------------------------------------------------------------------------------------------------------------------------|------------|
| pNA149 | ori ColA, kan <sup>R</sup> , <i>araC-P<sub>BAD</sub></i> SYNZIP18- <i>xtpS</i> _T <sub>2</sub> C <sub>3</sub> A <sub>3</sub> - N-terminally truncated SYNZIP1 (-14 AA) and <i>tacl</i>                                                                                                             | this study |
| pNA150 | ori CloDF13, spec <sup>R</sup> , <i>araC-P<sub>BAD</sub></i> N-terminally truncated SYNZIP2 (-14 AA)-<br><i>xtpS</i> _T <sub>3</sub> C/E <sub>4</sub> A <sub>4</sub> T <sub>4</sub> TE and <i>tacl</i>                                                                                             | this study |
| pNA151 | ori ColA, kan <sup>R</sup> , <i>araC-P<sub>BAD</sub></i> N-terminally truncated SYNZIP4 (-14 AA)-<br><i>xtpS</i> _T <sub>2</sub> C <sub>3</sub> A <sub>3</sub> T <sub>3</sub> C/E <sub>4</sub> A <sub>4</sub> T <sub>4</sub> TE und <i>tacl</i>                                                    | this study |
| pNA152 | ori ColA, kan <sup>R</sup> , <i>araC-P<sub>BAD</sub></i> SYNZIP18- <i>xtpS</i> _T <sub>2</sub> C <sub>3</sub> A <sub>3</sub> -SYNZIP17 and <i>tacl</i>                                                                                                                                             | this study |
| pNA153 | ori CloDF13, spec <sup>R</sup> , <i>araC-P<sub>BAD</sub></i> SYNZIP18- <i>xtpS</i> _T <sub>3</sub> C/E <sub>4</sub> A <sub>4</sub> T <sub>4</sub> TE and <i>tacl</i>                                                                                                                               | this study |
| pNA154 | ori ColA, kan <sup>R</sup> , <i>araC-P<sub>BAD</sub></i> SYNZIP18-(GS) <sub>5</sub> - <i>xtpS</i> _A <sub>3</sub> T <sub>3</sub> C/E <sub>4</sub> A <sub>4</sub> T <sub>4</sub> TE and<br><i>tacl</i>                                                                                              | this study |
| pNA155 | ori ColA, kan <sup>R</sup> , <i>araC-P<sub>BAD</sub></i> SYNZIP18-(GS) <sub>2</sub> - <i>xtpS</i> _A <sub>3</sub> T <sub>3</sub> C/E <sub>4</sub> A <sub>4</sub> T <sub>4</sub> TE and<br><i>tacl</i>                                                                                              | this study |
| pNA156 | ori p15A, cm <sup>R</sup> , <i>araC-P<sub>BAD</sub></i> <i>xtpS</i> _A <sub>1</sub> T <sub>1</sub> C/E <sub>2</sub> A <sub>2</sub> T <sub>2</sub> C <sub>3</sub> -SYNZIP17-<br>(NATETVYPES) and <i>tacl-araE</i>                                                                                   | this study |
| pNA157 | ori ColA, kan <sup>R</sup> , <i>araC-P<sub>BAD</sub></i> SYNZIP18- <i>xtpS</i> _T <sub>2</sub> C <sub>3</sub> A <sub>3</sub> -(GS) <sub>5</sub> -SYNZIP1 and<br><i>tacl</i>                                                                                                                        | this study |
| pNA158 | ori ColA, kan <sup>R</sup> , <i>araC-P<sub>BAD</sub></i> SYNZIP18- <i>xtpS</i> _T <sub>2</sub> C <sub>3</sub> A <sub>3</sub> -(GS) <sub>2</sub> -SYNZIP1 and<br><i>tacl</i>                                                                                                                        | this study |
| pNA159 | ori CloDF13, spec <sup>R</sup> , <i>araC-P<sub>BAD</sub></i> SYNZIP2-(GS) <sub>5</sub> - <i>xtpS</i> _T <sub>3</sub> C/E <sub>4</sub> A <sub>4</sub> T <sub>4</sub> TE and<br><i>tacl</i>                                                                                                          | this study |
| pNA160 | ori CloDF13, spec <sup>R</sup> , <i>araC-P<sub>BAD</sub></i> SYNZIP2-(GS) <sub>2</sub> - <i>xtpS</i> _T <sub>3</sub> C/E <sub>4</sub> A <sub>4</sub> T <sub>4</sub> TE and<br><i>tacl</i>                                                                                                          | this study |
| pNA161 | ori p15A, cm <sup>R</sup> , <i>araC-P<sub>BAD</sub></i> <i>xtpS</i> _A <sub>1</sub> T <sub>1</sub> C/E <sub>2</sub> A <sub>2</sub> -N-terminally truncated<br>SYNZIP2 (-14 AA) und <i>tacl-araE</i>                                                                                                | this study |
| pNA162 | ori ColA, kan <sup>R</sup> , <i>araC-P<sub>BAD</sub></i> N-terminally truncated SYNZIP19 (-7 AA)-<br><i>xtpS</i> _T <sub>2</sub> C <sub>3</sub> A <sub>3</sub> T <sub>3</sub> C/E <sub>4</sub> A <sub>4</sub> T <sub>4</sub> TE und <i>tacl</i>                                                    | this study |
| pNA163 | ori p15A, cm <sup>R</sup> , <i>araC-P<sub>BAD</sub></i> <i>xtpS</i> _A <sub>1</sub> T <sub>1</sub> C/E <sub>2</sub> A <sub>2</sub> T <sub>2</sub> C <sub>3</sub> - C-terminally truncated<br>SYNZIP17 (-7 AA) and <i>tacl-araE</i>                                                                 | this study |
| pNA164 | ori ColA, kan <sup>R</sup> , <i>araC-P<sub>BAD</sub></i> C-terminally truncated SYNZIP18 (-7 AA)-<br><i>xtpS</i> _A <sub>3</sub> T <sub>3</sub> C/E <sub>4</sub> A <sub>4</sub> T <sub>4</sub> TE and <i>tacl</i>                                                                                  | this study |
| pNA165 | ori ColA, kan <sup>R</sup> , <i>araC-P<sub>BAD</sub></i> SYNZIP18- <i>xtpS</i> _T <sub>2</sub> C <sub>3</sub> A <sub>3</sub> -N-terminally truncated<br>SYNZIP1(-28 AA) and <i>tacl</i>                                                                                                            | this study |
| pNA166 | ori CloDF13, spec <sup>R</sup> , <i>araC-P<sub>BAD</sub></i> N-terminally truncated SYNZIP2 (-28 AA)-<br><i>xtpS</i> _T <sub>3</sub> C/E <sub>4</sub> A <sub>4</sub> T <sub>4</sub> TE and <i>tacl</i>                                                                                             | this study |
| pNA167 | ori ColA, kan <sup>R</sup> , <i>araC-P<sub>BAD</sub></i> SYNZIP18- <i>gxpS</i> _T <sub>2</sub> C <sub>3</sub> A <sub>3</sub> -N-terminally<br>truncated SYNZIP1 (-14 AA) and <i>tacl</i>                                                                                                           | this study |
| pNA168 | ori ColA, kan <sup>R</sup> , <i>araC-P<sub>BAD</sub></i> SYNZIP18- <i>szeS</i> _T <sub>2</sub> C <sub>3</sub> A <sub>3</sub> -N-terminally<br>truncated SYNZIP1 (-14 AA) and <i>tacl</i>                                                                                                           | this study |
| pNA169 | ori CloDF13, spec <sup>R</sup> , <i>araC-P<sub>BAD</sub></i> N-terminally truncated SYNZIP2 (-14 AA)-<br><i>szeS</i> _T <sub>3</sub> C/E <sub>4</sub> A <sub>4</sub> T <sub>4</sub> C/E <sub>5</sub> A <sub>5</sub> T <sub>5</sub> C <sub>6</sub> A <sub>6</sub> T <sub>6</sub> TE and <i>tacl</i> | this study |
| pNA170 | ori pUC19, kan <sup>R</sup> , <i>araC-P<sub>BAD</sub></i> SYNZIP18- <i>xtpS</i> _T <sub>2</sub> C <sub>3</sub> A <sub>3</sub> -SYNZIP17 and <i>tacl</i>                                                                                                                                            | this study |
| pJW61  | ori p15A, cm <sup>R</sup> , <i>araC-P<sub>BAD</sub></i> <i>xtpS</i> _A <sub>1</sub> T <sub>1</sub> C/E <sub>2</sub> A <sub>2</sub> T <sub>2</sub> C <sub>3</sub> -SYNZIP17 and <i>tacl-araE</i>                                                                                                    | 5          |
| pJW62  | ori ColA, kan <sup>R</sup> , <i>araC-P<sub>BAD</sub></i> SYNZIP18- <i>xtpS</i> _A <sub>3</sub> T <sub>3</sub> C/E <sub>4</sub> A <sub>4</sub> T <sub>4</sub> TE and <i>tacl</i>                                                                                                                    | 5          |

95 **Table S4.** Oligonucleotides used in this work.

| Plasmids | Oligo-nucleotides | Sequence (5' →3'; <u>overlapping ends</u> )                                                                               | Template                            |
|----------|-------------------|---------------------------------------------------------------------------------------------------------------------------|-------------------------------------|
| pNA8     | KB-pACYC-II-FW    | AACGAGAAGGAGGAATTAATAATCG                                                                                                 | pJW61                               |
|          | na17_RV           | <u>CGATTTTAATTCCTCCTTCTCGTTT</u> GATCCCGAACCTGAGCCGGATC<br>CAGACCCCCAGGTTTTTAACAACAATGTGC                                 | pJW61                               |
| pNA9     | KB-pACYC-II-FW    | AACGAGAAGGAGGAATTAATAATCG                                                                                                 | pJW61                               |
|          | na19_RV           | <u>CGATTTTAATTCCTCCTTCTCGTTT</u> CGAACCTGAGCCGGATCCAGACC<br>CCCAGGTTTTTAACAACAATGTGC                                      | pJW61                               |
| pNA10    | KB-pACYC-II-FW    | AACGAGAAGGAGGAATTAATAATCG                                                                                                 | pJW61                               |
|          | na20_RV           | <u>CGATTTTAATTCCTCCTTCTCGTTT</u> GATCCAGACCCCCAGGTTTTTA<br>ACAACAATGTG                                                    | pJW61                               |
| pNA40    | na3               | TGGGCTAACAGGAGGAATTCATGAAAGATAGCATGGCTAAAAAGG<br>G                                                                        | <i>X. nematophila</i><br>ATCC 19061 |
|          | na87              | CTTACGCAGATACGCGTTACGCGCATAAATCTGGCGGGCGAA                                                                                | <i>X. nematophila</i><br>ATCC 19061 |
|          | na85              | GCTGGAACGTGATGAACAGAACCTGGAAAAATCATCGCGAACCTG<br>CGTGACGAAATCGCGCTCTCGAAAACGAAGTTGCGTCTCACGAAC<br>AGTGACAATTAATCATCGGCTCG | pCK_0402                            |
|          | na43              | CATGGAATTCCTCCTGTTAGCC                                                                                                    | pCK_0402                            |
|          | na86              | GCGCGTAACGCGTATCTGCGTAAGAAAATCGCACGTCTGAAAAAG<br>ACAACCTGCAGCTGGAACGTGATGAACAGAAC                                         | pNA40_BB1_SZ2<br>half               |
|          | na43              | CATGGAATTCCTCCTGTTAGCC                                                                                                    | pNA40_BB1_SZ2<br>half               |
| pNA41    | na90              | GACGCGTACAAAACCGTCTGTTGCGCCACAAGGAGAA                                                                                     | <i>X. nematophila</i><br>ATCC 19061 |
|          | na7               | CGAGCCGATGATTAATTGTCACAGCGCCTCCACTTCG                                                                                     | <i>X. nematophila</i><br>ATCC 19061 |
|          | jw61              | TGACAATTAATCATCGGCTCG                                                                                                     | pCOLA_ara/tacl                      |
|          | na88              | GTTTCTGTTTCAGCTGTTACGTTTCTGCTTCAGCTCTTCGTTACGG<br>TTCTTCAGTTCTTCTTTTTGTTCTCCAGAGATCCAGTTTCGTTCATG<br>GAATTCCTCCTGTTAGCC   | pCOLA_ara/tacl                      |
|          | jw61              | TGACAATTAATCATCGGCTCG                                                                                                     | pNA41_BB1_SZ1<br>9half              |
|          | na89              | CAGACGGTTTTTGTACGCGTCCAGTTTGTACGCAGAGCCGCCAGT<br>TTCTGTTTCAGCTGTTACG                                                      | pNA41_BB1_SZ1<br>9half              |
| pNA42    | na3               | TGGGCTAACAGGAGGAATTCATGAAAGATAGCATGGCTAAAAAGG<br>G                                                                        | <i>X. nematophila</i><br>ATCC 19061 |
|          | na93              | TTCCAGCTGCGCAACTTCGTTATAAATCTGGCGGGCGAA                                                                                   | <i>X. nematophila</i><br>ATCC 19061 |
|          | na91              | GCGTACCTGGAGAAGGAGATCGCGCGTCTGCGTAAAGAAATTGCG<br>GCGCTGCGTGACCGTCTGGCGCACAAAAATGACAATTAATCATCG<br>GCTCG                   | pCK_0402                            |
|          | na43              | CATGGAATTCCTCCTGTTAGCC                                                                                                    | pCK_0402                            |
|          | na92              | AACGAAGTTGCGCAGCTGAAAACGACGTTGCGGTTATCGAAAATG<br>AAAACGCGTACCTGGAGAAGGAGATC                                               | pNA42_BB1_<br>SZ21half              |
|          | na43              | CATGGAATTCCTCCTGTTAGCC                                                                                                    | pNA42_BB1_<br>SZ21half              |
| pNA43    | na96              | TGAAAAACGACGTTGCAGAAGTTGCGCCACAAGGAGAA                                                                                    | <i>X. nematophila</i><br>ATCC 19061 |
|          | na7               | CGAGCCGATGATTAATTGTCACAGCGCCTCCACTTCG                                                                                     | <i>X. nematophila</i><br>ATCC 19061 |
|          | jw61              | TGACAATTAATCATCGGCTCG                                                                                                     | pCOLA_ara/tacl                      |
|          | na102             | CGTTACGATTCAGTTAAACCGCAACACGGTTTTTGTGATTCGCAACT<br>TTCTGCATGGAATTCCTCCTGTTAGCC                                            | pCOLA_ara/tacl                      |

|        |                |                                                         |                       |
|--------|----------------|---------------------------------------------------------|-----------------------|
|        | jw61           | TGACAATTAATCATCGGCTCG                                   | pNA41_BB1_SZ4<br>half |
|        | na103          | CGGTTACGGTCTTCAGCTCTTCAACTTTGTTTTTCAGCTGTT <u>CGTTA</u> | pNA41_BB1_SZ4<br>half |
|        | jw61           | CGATT <u>CGTTTAACCGC</u>                                | pNA41_BB2_SZ4<br>half |
|        | na95           | TGACAATTAATCATCGGCTCG                                   | pNA41_BB2_SZ4<br>half |
|        | na95           | TTCTGCAACGTCGTTTTCCAGACGCGCAACCTCGTTCTCCAGGGTC          | pNA41_BB2_SZ4<br>half |
|        | na95           | GCCAGTTCGTTCTTGAGGTAAGCGTTACGGTCTTCAGCTC                | pNA41_BB2_SZ4<br>half |
| pNA72  | na141          | ATCGCACGTCTGAAAAAAGAC                                   | pNA40                 |
|        | na144          | GTCTTTTTTCAGACGTGCGATA <u>ATAAATCTGGCGGGCGAA</u>        | pNA40                 |
| pNA73  | na143          | CTGGAATCTCTGAGAAACAAAAAG                                | pNA41                 |
|        | Na145          | CTTTTTTGTCTCCAGAGATTCCAGCATGGAATTCCTCCTGTTAGCC          | pNA41                 |
| pNA145 | na304          | CATTGTTGTTAAAAACCTGGTCGAAAAAGGCTGAATTGC                 | pJW61                 |
|        | jw62           | CCAGGTTTTTAACAACAATGTGC                                 | pJW61                 |
| pNA146 | na305          | CTAACAGGAGGAATTCCATGCTGAAAGCCTTGACCGC                   | pJW62                 |
|        | jw64           | CATGGAATTCCTCCTGTTAGCC                                  | pJW62                 |
| pNA147 | na306          | CATTGTTGTTAAAAACCTGGAATCGCATCGAACAGTTAAACAG             | pJW61                 |
|        | jw62           | CCAGGTTTTTAACAACAATGTGC                                 | pJW61                 |
| pNA148 | na307          | CTAACAGGAGGAATTCCATGTTAAATGCCATTGACAAAGAGCTG            | pJW62                 |
|        | jw64           | CATGGAATTCCTCCTGTTAGCC                                  | pJW62                 |
| pNA149 | na308          | GTTTGCCCGGCAGGTCTATAATGAGAACGAAACCCTGAAGAAAAAG          | pNA125                |
|        | na286          | ATAGACCTGCCGGGCAAAC                                     | pNA125                |
| pNA150 | na309          | CTAACAGGAGGAATTCCATGAAAGACAACCTGCAGCTGGAAC              | pNA126                |
|        | na43           | CATGGAATTCCTCCTGTTAGCC                                  | pNA126                |
| pNA151 | na310          | CTAACAGGAGGAATTCCATGAATCGTAACGAACAGCTGAAAAAC            | pNA43                 |
|        | jw64           | CATGGAATTCCTCCTGTTAGCC                                  | pNA43                 |
| pNA152 | jw61           | TGACAATTAATCATCGGCTCG                                   | pNA15                 |
|        | na286          | ATAGACCTGCCGGGCAAAC                                     | pNA15                 |
|        | na311          | GTTTGCCCGGCAGGTCTATAACGAGAAGGAGGAATTAATTCG              | pJW61                 |
|        | na312          | CGAGCCGATGATTAATTGTCACTTGTAGGCTTCGATCTCCTTACG           | pJW61                 |
| pNA153 | na315          | CAAGCGCCACAAGGGGA                                       | pNA28                 |
|        | na43           | CATGGAATTCCTCCTGTTAGCC                                  | pNA28                 |
|        | na313          | GGCTAACAGGAGGAATTCCATGTTCTATGCTGAAGAGCGTGA <u>ACTG</u>  | pJW62                 |
|        | na314          | TTCCCTTGTTGGCGCTTGAGATAGCTGCAGTCAGCTCG                  | pJW62                 |
| pNA154 | na316          | AACGAGCTGACTGCAGCTATCTCAGGGTCTGGATCCGGCTCAGGTT          | pJW62                 |
|        | na317          | CGGGATCATTATGTATTATCACTTTTTGAACAGC                      | pJW62                 |
|        | na317          | TGAGATAGCTGCAGTCAGCTC                                   | pJW62                 |
| pNA155 | na318          | AACGAGCTGACTGCAGCTATCTCAGGTTCCGGATCATTATGTATTCA         | pJW62                 |
|        | na317          | TCAACTTTTTGAACAGC                                       | pJW62                 |
|        | na317          | TGAGATAGCTGCAGTCAGCTC                                   | pJW62                 |
| pNA156 | KB-pACYC-II-FW | AACGAGAAGGAGGAATTAATTCG                                 | pJW61                 |



|        |       |                                                                                    |       |
|--------|-------|------------------------------------------------------------------------------------|-------|
|        | na319 | CGATTTAATTCTCTCTCTCGTTTCGATTTCAGGATACACGGTTTCAG<br>TGGCATTCCAGGTTTTTAAACAACAATGTGC | pJW61 |
| pNA157 | na320 | GTTTGCCCGGCAGGTCTATGGGTCTGGATCCGGCTCAGGTTCTGGG<br>ATCAAACCTGGTTGCGCAGCTC           | pNA15 |
|        | na286 | ATAGACCTGCCGGGCAAAC                                                                | pNA15 |
| pNA158 | na321 | GTTTGCCCGGCAGGTCTATGGTTCCGGGATCAAACCTGGTTGCGCAG<br>CTC                             | pNA15 |
|        | na286 | ATAGACCTGCCGGGCAAAC                                                                | pNA15 |
| pNA159 | na322 | GAAGTTGCGTCTCACGAACAGGGGTCTGGATCCGGCTCAGGTTTCG<br>GGATCAGCGGCTCCGAGGG              | pNA16 |
|        | na290 | CTGTTCTGAGACGCAACTTC                                                               | pNA16 |
| pNA160 | na323 | GAAGTTGCGTCTCACGAACAGGGTTCCGGATCAGCGGCTCCGAG<br>GG                                 | pNA16 |
|        | na290 | CTGTTCTGAGACGCAACTTC                                                               | pNA16 |
| pNA161 | na324 | TTCGCCCCCAGATTTATAAAGACAACCTGCAGCTGGAAC                                            | pNA44 |
|        | na142 | ATAAATCTGGCGGGCGAA                                                                 | pNA44 |
| pNA162 | na325 | GGCTAACAGGAGGAATTCATGAACAAAAAGAAGAAGTGAAGAAC<br>CG                                 | pNA45 |
|        | na43  | CATGGAATTCCTCTGTTAGCC                                                              | pNA45 |
| pNA163 | jw61  | TGACAATTAATCATCGGCTCG                                                              | pJW61 |
|        | na326 | CGAGCCGATGATTAATTGTCAACGCAGATTGGCGATCTTTG                                          | pJW61 |
| pNA164 | jw63  | TTATGTATTCATCAACTTTTTGAACAGC                                                       | pJW62 |
|        | na327 | GCTGTTCAAAAAGTTGATGAATACATAAGTTATCAAGGGCGCGAAGT<br>T                               | pJW62 |
| pNA165 | na329 | GTTTGCCCGGCAGGTCTATGACCTGATCGCGTACCTGG                                             | pNA15 |
|        | na286 | ATAGACCTGCCGGGCAAAC                                                                | pNA15 |
| pNA166 | na330 | GGCTAACAGGAGGAATTCATGAAATCATCGCGAACCTGC                                            | pNA16 |
|        | na43  | CATGGAATTCCTCTGTTAGCC                                                              | pNA16 |
| pNA167 | na331 | AATGAGAACGAAACCCTGAAGAAAAAG                                                        | pNA27 |
|        | na333 | CTTTTTCTTCAGGGTTTCGTTCTCATTGTAAGCTTGGCGAGCAAAGG                                    | pNA27 |
| pNA168 | na331 | AATGAGAACGAAACCCTGAAGAAAAAG                                                        | pNA30 |
|        | na332 | CTTTTTCTTCAGGGTTTCGTTCTCATTATAATGCTGACGGGCAAACG                                    | pNA30 |
| pNA169 | na309 | CTAACAGGAGGAATTCATGAAAGACAACCTGCAGCTGGAAC                                          | pNA31 |
|        | na43  | CATGGAATTCCTCTGTTAGCC                                                              | pNA31 |

96

97

98

99

100

101

## 102 2. Supplementary Figures

103

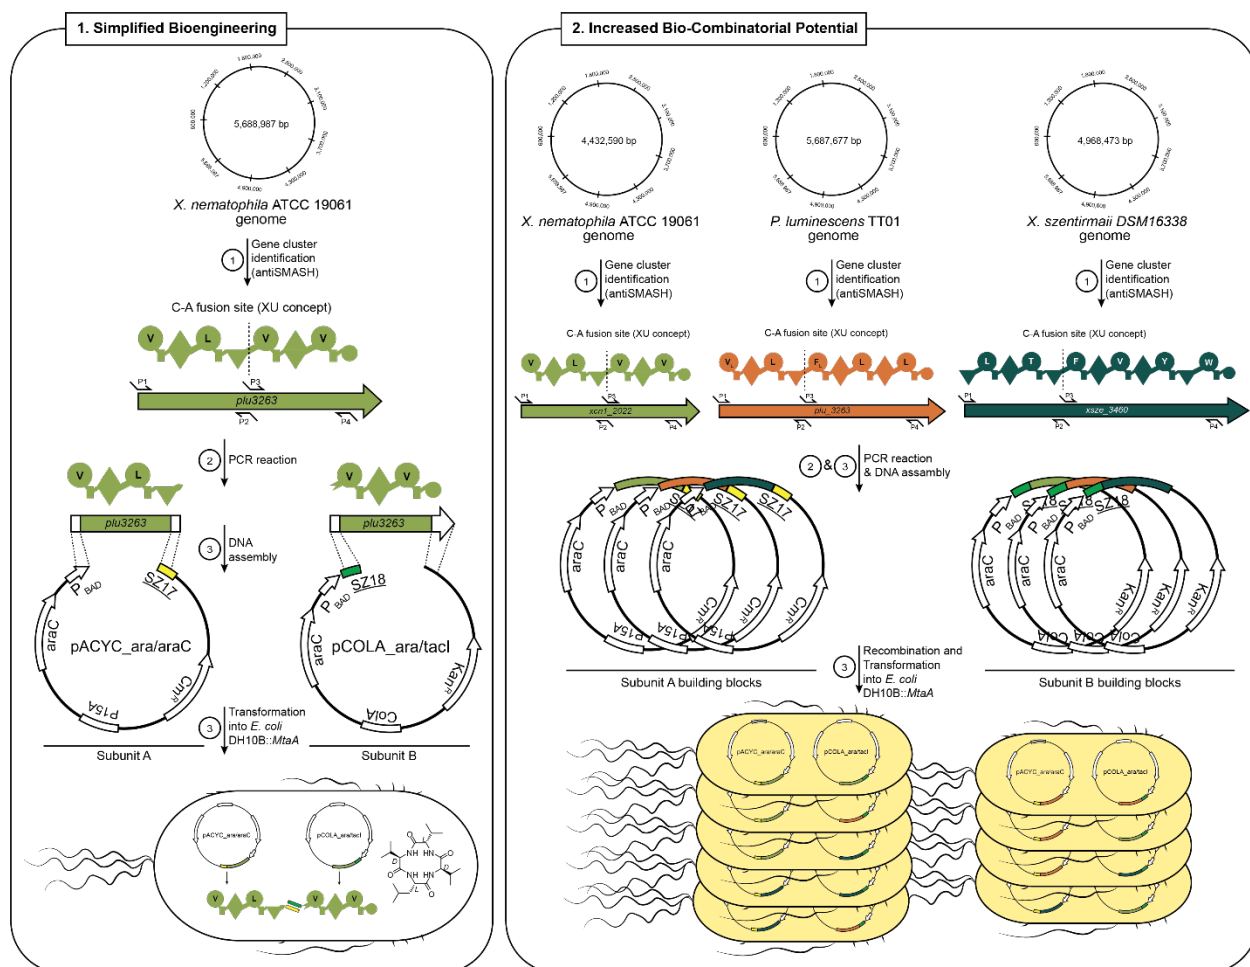

104

105 **Figure S1. Advantages of Type S NRPS. 1) Simplified bioengineering:** Splitting NRPS into two or three  
 106 independently expressed SYNZIP linked subunits enables easier and faster cloning. Traditional NRPS  
 107 engineering often requires elaborated cloning strategies (yeast cloning,<sup>6</sup> LLHR<sup>7</sup> or ExoCET<sup>8</sup>) which are  
 108 frequently accompanied with technical problems and limitation. By breaking NRPSs into smaller subunits,  
 109 cloning can be simplified, making standard strategies such as Gibson<sup>9</sup>, HiFi and Hot Fusion<sup>10</sup> assembly  
 110 sufficient. **2) Increased bio-combinatorial potential:** With SYNZIPs, type S NRPSs can be created faster  
 111 and to a greater extent than before, as the number of artificial NRPSs increases exponentially with the  
 112 number of subunits. Once generated, subunits can be reused at any time and for any experimental  
 113 approaches without any additional cloning efforts.

114

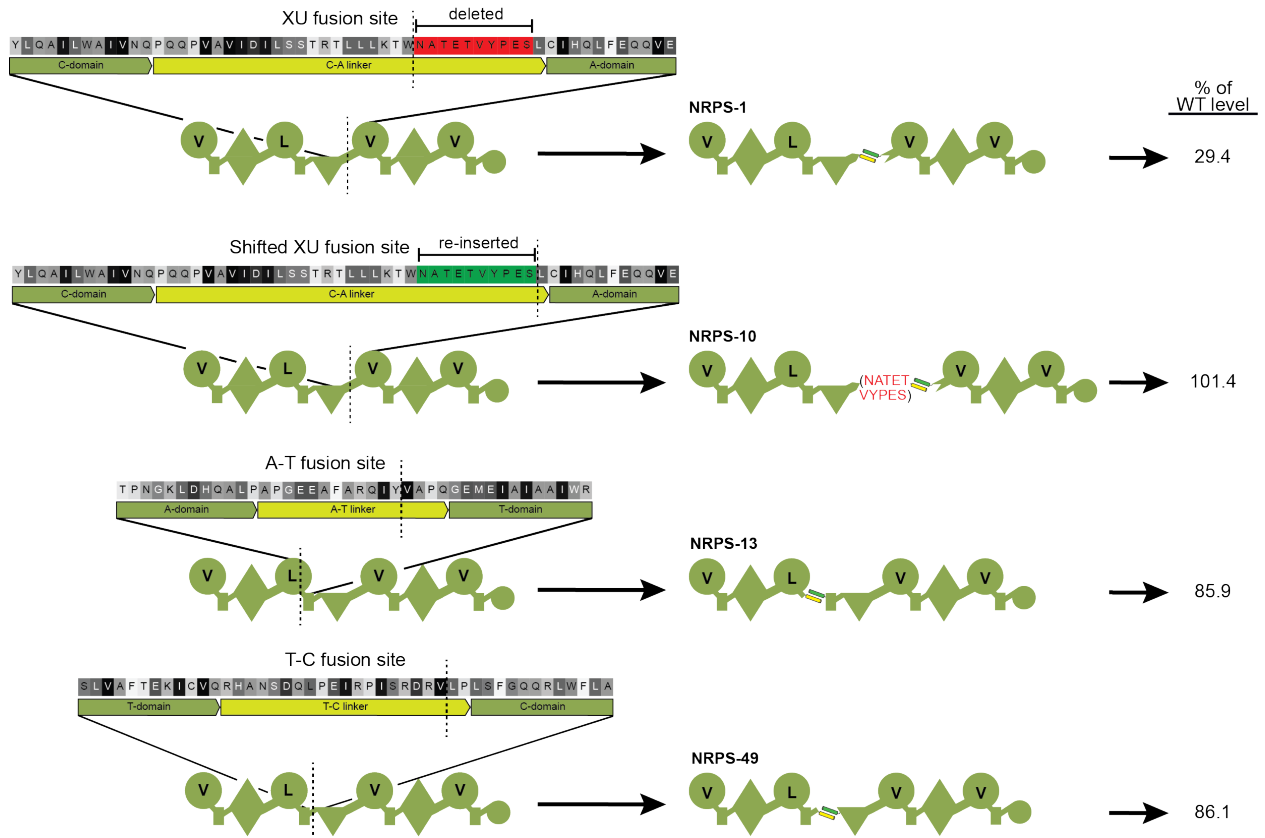

115

116 **Figure S2. Other splicing positions.** SZ17:18 Introduction at three different positions within the C-A, T-C  
 117 and A-T linker region to create two protein type S XtpS variants. AS sequences and exact SZ17:18  
 118 introduction sites are highlighted with a vertical dashed line. Initially, for the introduction of SYNZIPs into  
 119 the C-A position, 10 AAs were deleted (highlighted in red) to meet the distance between the C- and A-  
 120 domain. Re-insertion of the 10 AAs (highlighted in green) and shifted fusion site restored peptide  
 121 production. Production of 1 (cyclo (vLvV)) relative to WT level are indicated on the right hand site.

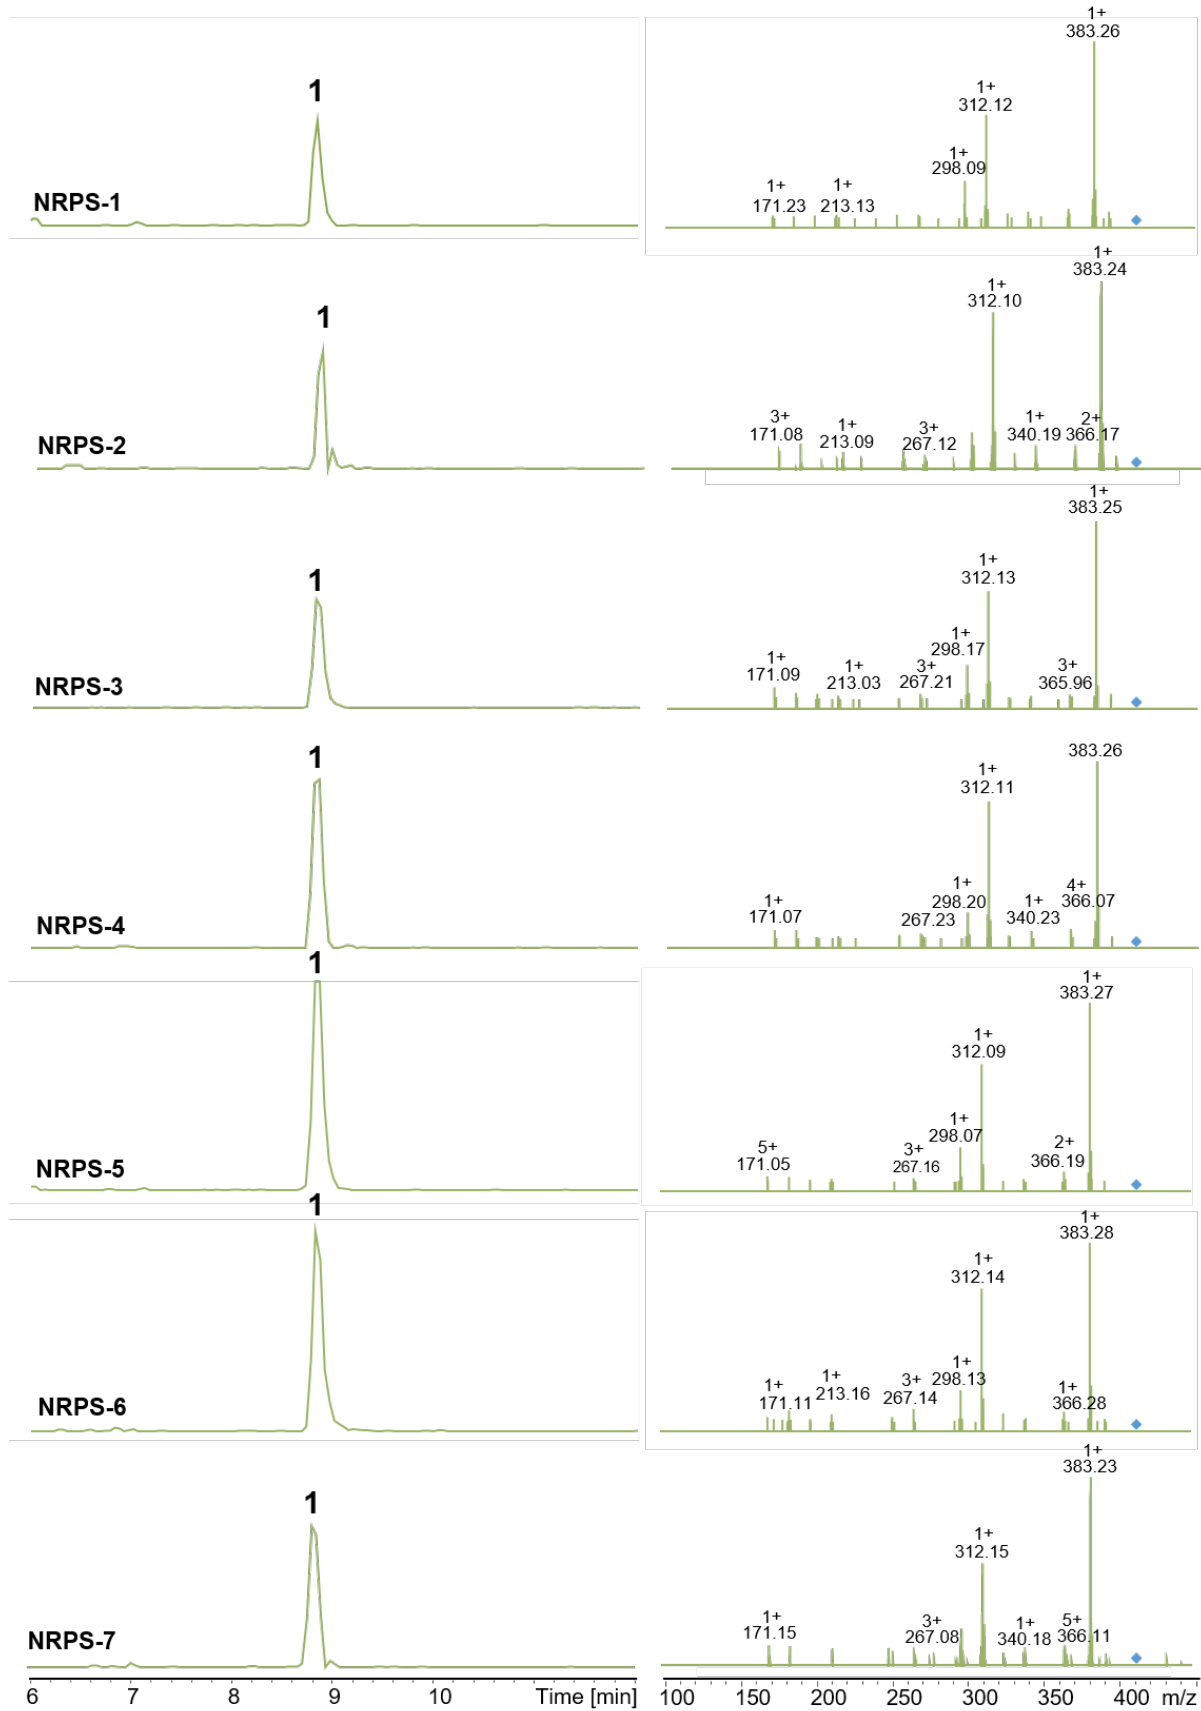

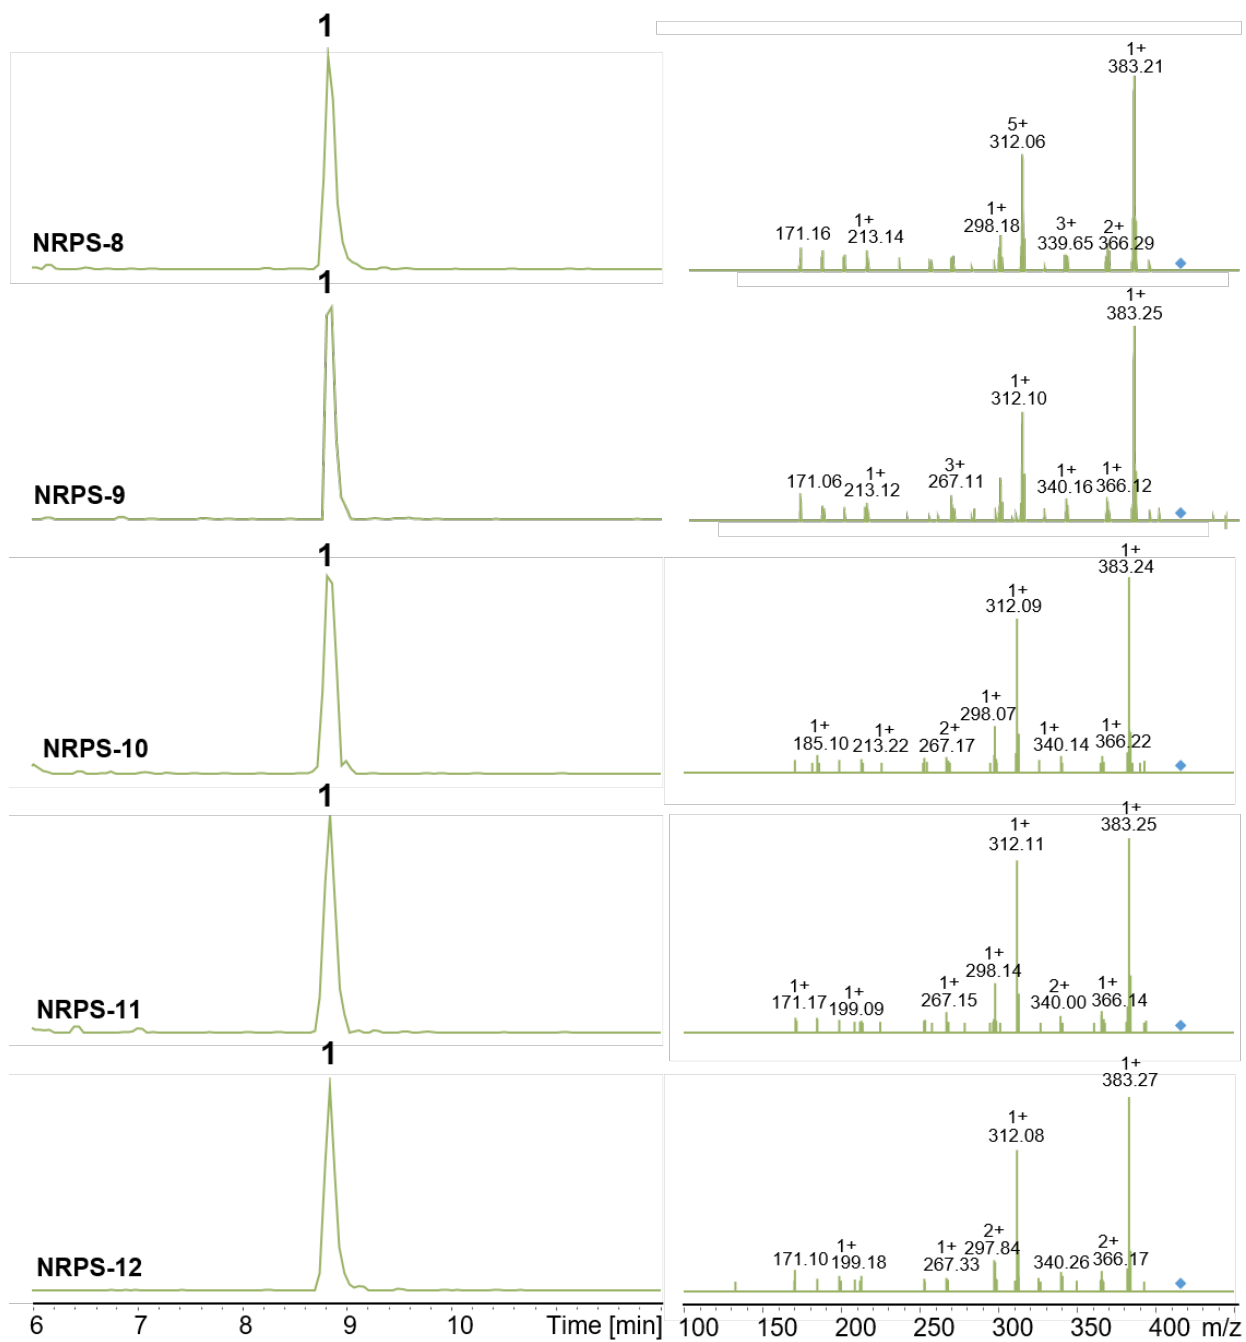

123

124 **Figure S3. HPLC/MS data (Figure 2) of compound 1 produced in *E. coli* DH10B::*mtaA*. EIC/MS<sup>2</sup> of 1**  
 125 **(m/z [M+H]<sup>+</sup> = 411.29) produced by NRPS-1 to -12.**

126

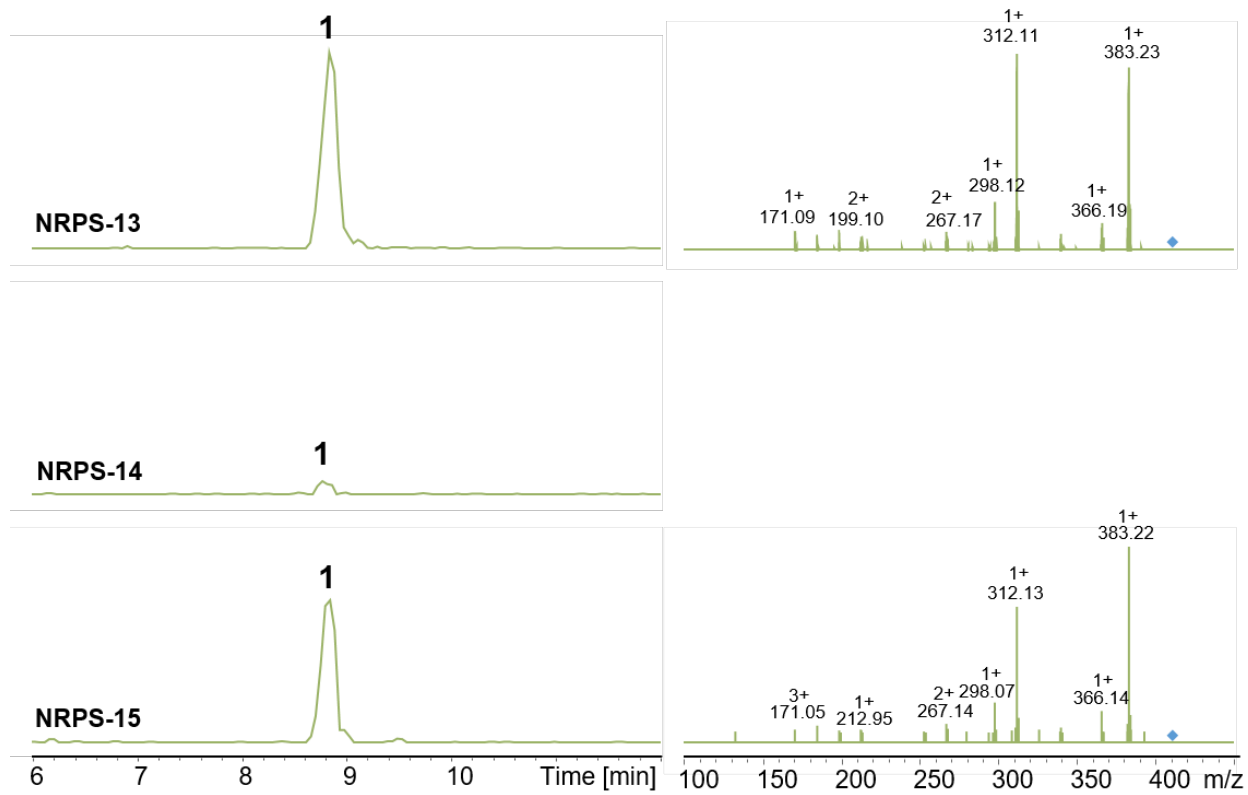

127

128 **Figure S4. HPLC/MS data (Figure 3) of compounds 1 produced in *E. coli* DH10B::*taA*. EIC/MS<sup>2</sup> of 1**  
 129 **(m/z [M+H]<sup>+</sup> = 411.29) produced by NRPS-13 to -15.**

130

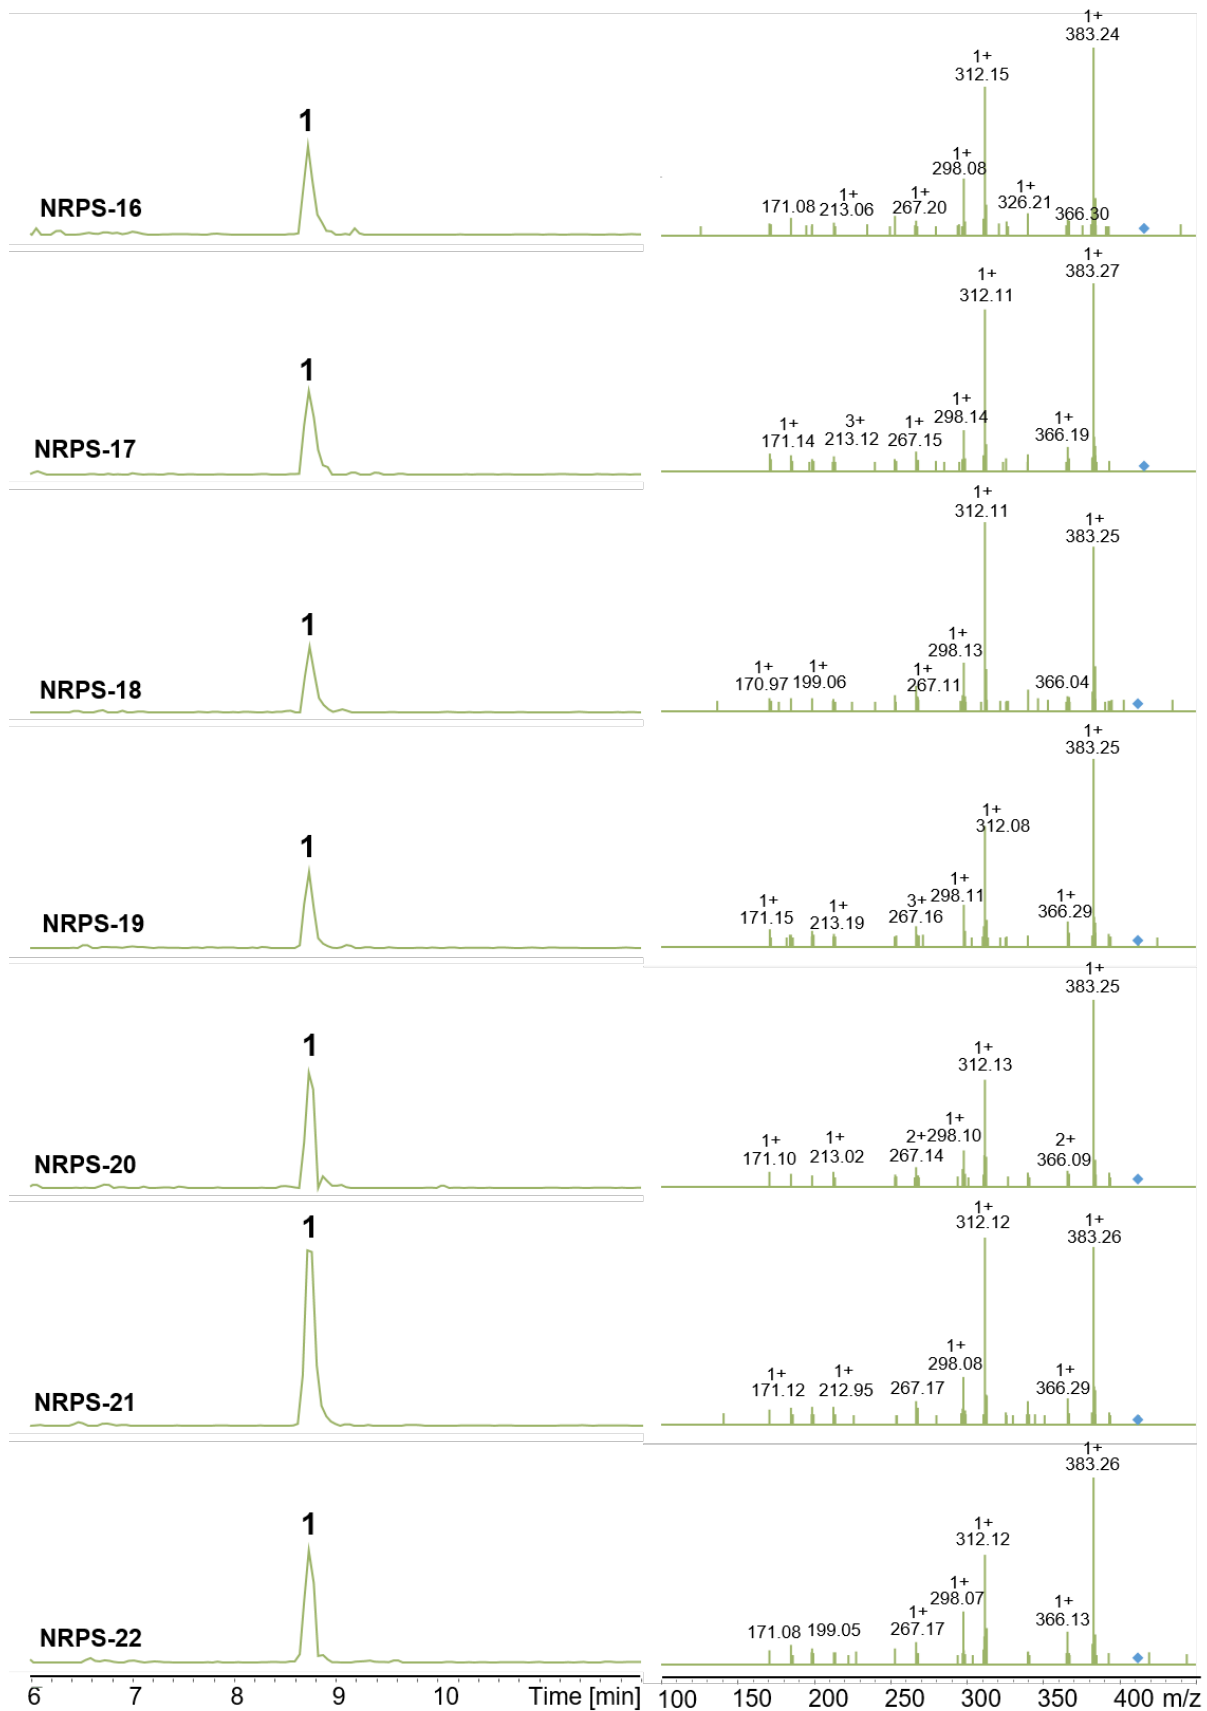

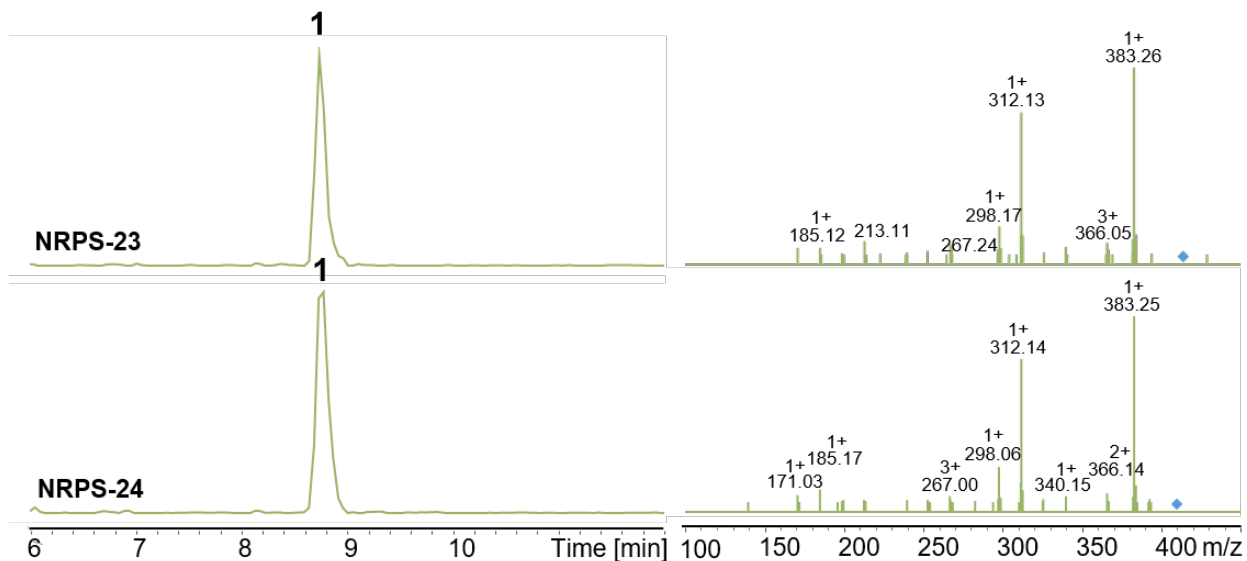

132

133 **Figure S5. HPLC/MS data (Figure 4) of compound 1 produced in *E. coli* DH10B::*mtaA*. EIC/MS<sup>2</sup> of 1**  
 134 **( $m/z$   $[M+H]^+$  = 411.29) produced by NRPS-16 to -24.**

135

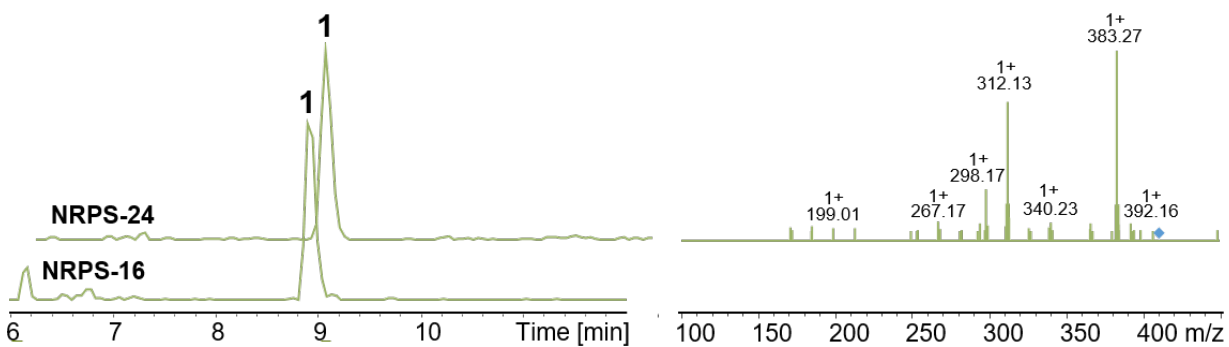

136

137 **Figure S6. HPLC/MS data (Figure 5) of compound 1 produced in *E. coli* DH10B::*mtaA*. EIC/MS<sup>2</sup> of 1**  
 138 **( $m/z$   $[M+H]^+$  = 411.29) produced by NRPS-24. EIC of 1 produced by NRPS-16.**

139

140

141

142



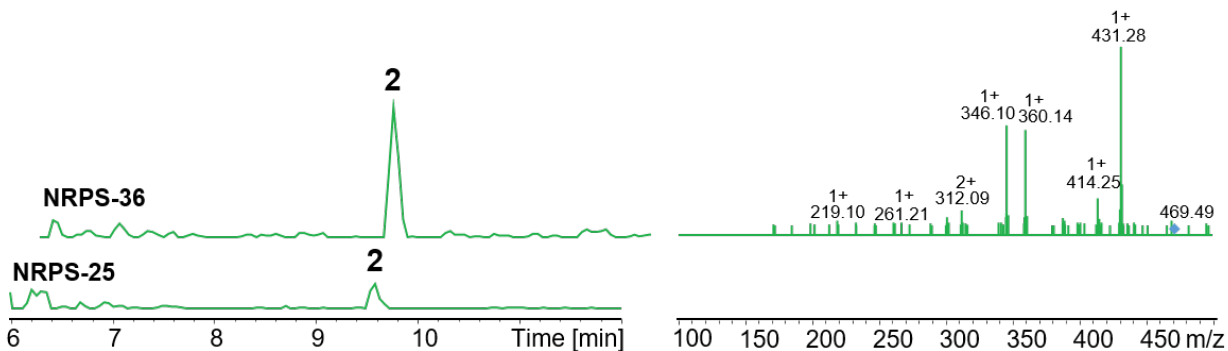

143

144 **Figure S7. HPLC/MS data (Figure 5) of compound 2 produced in *E. coli* DH10B::*mtaA*. EIC/MS<sup>2</sup> of 2**  
 145 **(m/z [M+H]<sup>+</sup> = 459.30) produced by NRPS-36. EIC of 1 produced by NRPS-25.**

146

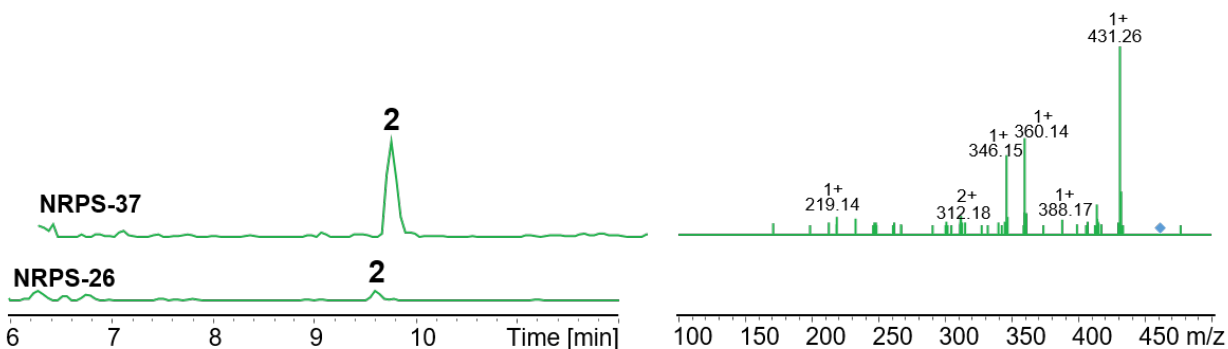

147

148 **Figure S8. HPLC/MS data (Figure 5) of compound 2 produced in *E. coli* DH10B::*mtaA*. EIC/MS<sup>2</sup> of 2**  
 149 **(m/z [M+H]<sup>+</sup> = 459.30) produced by NRPS-37. EIC of 1 produced by NRPS-26.**

150

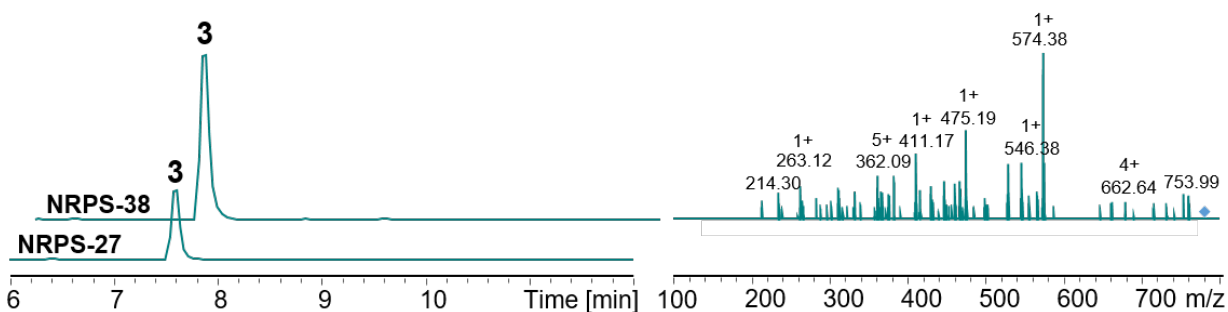

151

152 **Figure S9. HPLC/MS data (Figure 5) of compound 3 produced in *E. coli* DH10B::*mtaA*. EIC/MS<sup>2</sup> of 3**  
 153 **(m/z [M+H]<sup>+</sup> = 778,45) produced by NRPS-38. EIC of 3 produced by NRPS-27.**

154

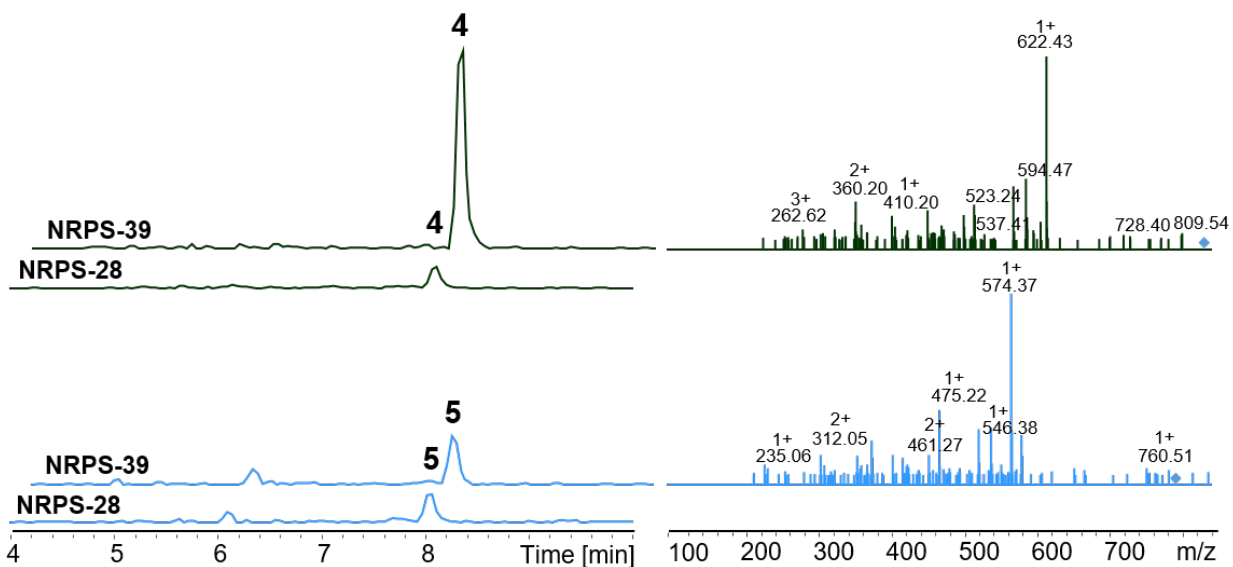

155

156 **Figure S10. HPLC/MS data (Figure 5) of compounds 4 and 5 produced in *E. coli* DH10B::*mtaA*.**  
 157 EIC/MS<sup>2</sup> of 4 (m/z [M+H]<sup>+</sup> = 826.45) and 5 (m/z [M+H]<sup>+</sup> = 792.47) produced by NRPS-38. EIC of 4 and 5  
 158 produced by NRPS-28.

159

160

161

162

163

164

165

166

167

168

169

170

171

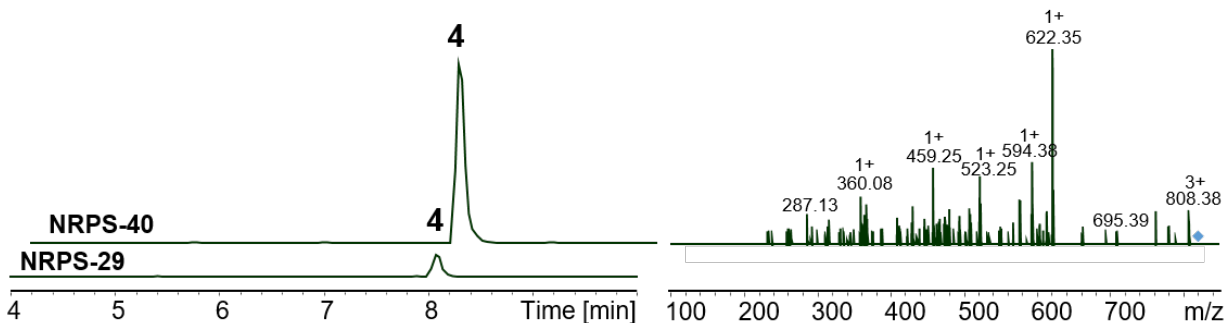

172

173 **Figure S11. HPLC/MS data (Figure 5) of compound 4 produced in *E. coli* DH10B::*mtaA*.** EIC/MS<sup>2</sup> of 4  
 174 (m/z [M+H]<sup>+</sup> = 826.45) produced by NRPS-38. EIC of 4 produced by NRPS-28.

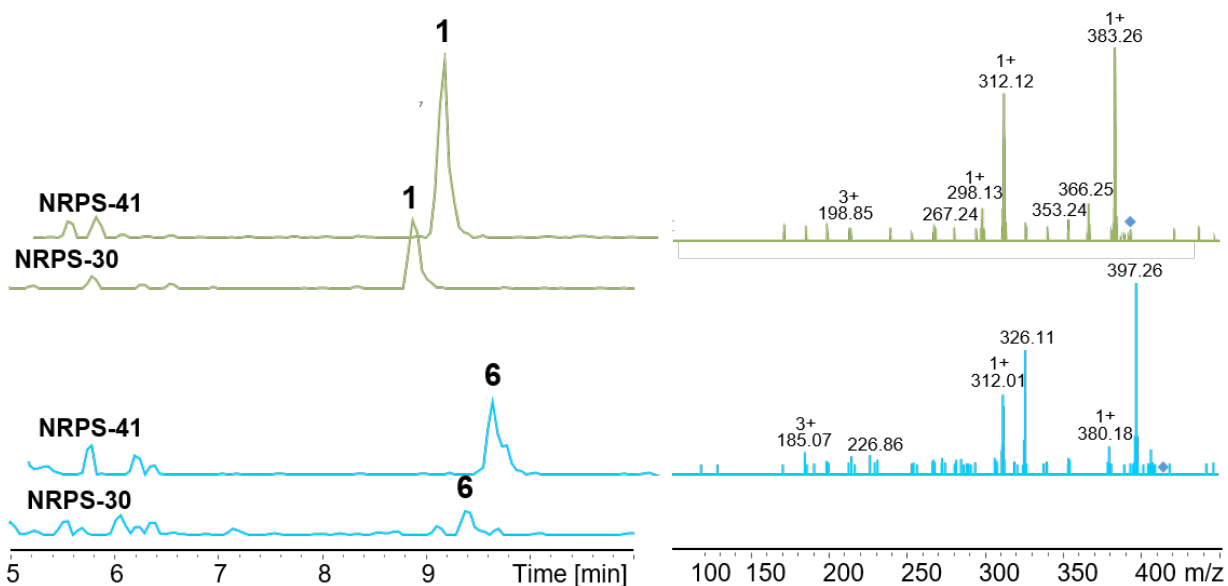

175

176 **Figure S12. HPLC/MS data (Figure 5) of compounds 1 and 6 produced in *E. coli* DH10B::*mtaA*.**  
 177 EIC/MS<sup>2</sup> of 1 (m/z [M+H]<sup>+</sup> = 411.29) and 6 (m/z [M+H]<sup>+</sup> = 425.31) produced by NRPS-41. EIC of 1 and 6  
 178 produced by NRPS-30.

179

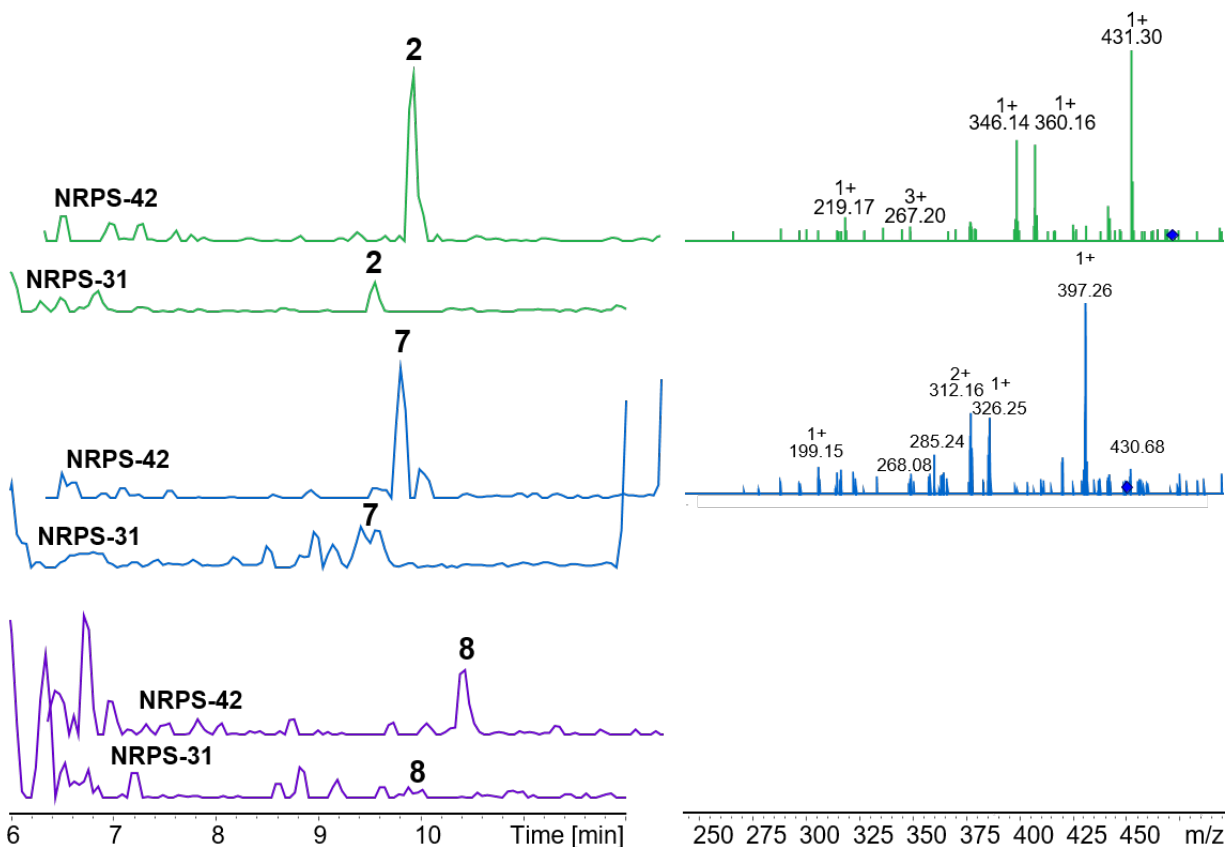

180

181 **Figure S13. HPLC/MS data (Figure 5) of compounds 2, 7 and 8 produced in *E. coli* DH10B::*mtaA*.**  
 182 EIC/MS<sup>2</sup> of 2 (m/z [M+H]<sup>+</sup> = 459.30), 7 (m/z [M+H]<sup>+</sup> = 425.31) and 8 m/z [M+H]<sup>+</sup> = 472.31) produced by  
 183 NRPS-42. EIC of 2, 7 and 8 produced by NRPS-31.  
 184

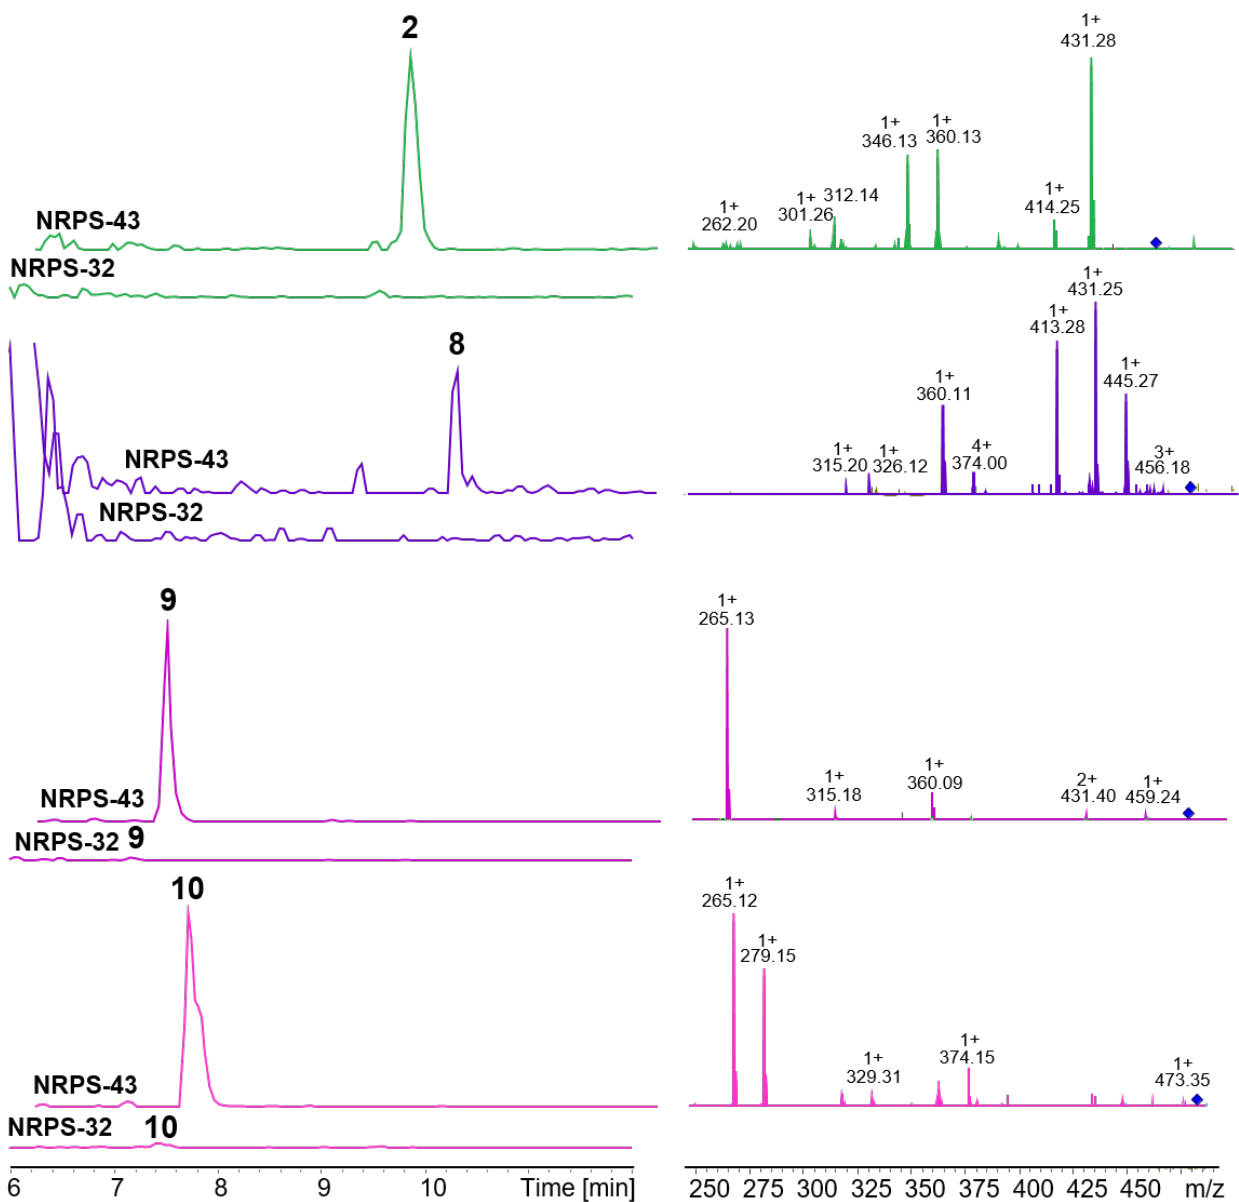

185

186 **Figure S14. HPLC/MS data (Figure 5) of compounds 2, 8, 9 and 10 produced in *E. coli* DH10B::*mtaA*.**  
 187 EIC/MS<sup>2</sup> of 2 (m/z [M+H]<sup>+</sup> = 459.30), 8 (m/z [M+H]<sup>+</sup> = 472.31), 9 (m/z [M+H]<sup>+</sup> = 476.62) and 10 m/z [M+H]<sup>+</sup>  
 188 = 490.65) produced by NRPS-43. EIC of 2, 8, 9 and 10 produced by NRPS-32.  
 189

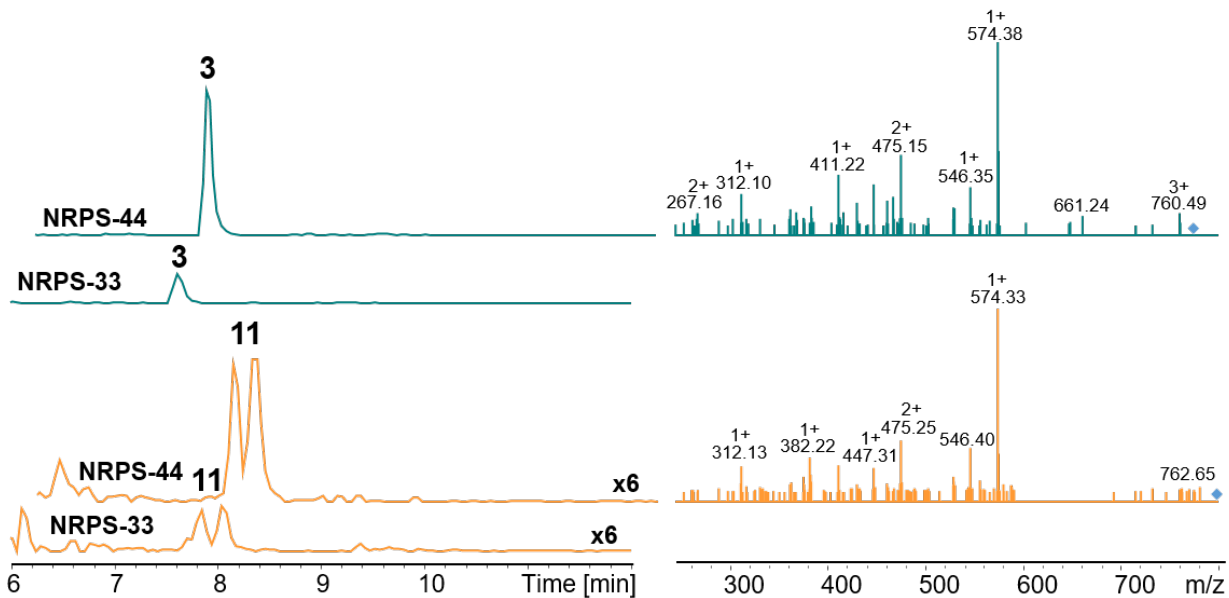

190

191 **Figure S15. HPLC/MS data (Figure 5) of compounds 3 and 11 produced in *E. coli* DH10B::mtaA.**  
 192 EIC/MS<sup>2</sup> of 3 (m/z [M+H]<sup>+</sup> = 778.45) and 11 (m/z [M+H]<sup>+</sup> = 792.47) produced by NRPS-44. EIC of 3 and 11  
 193 produced by NRPS-33.  
 194

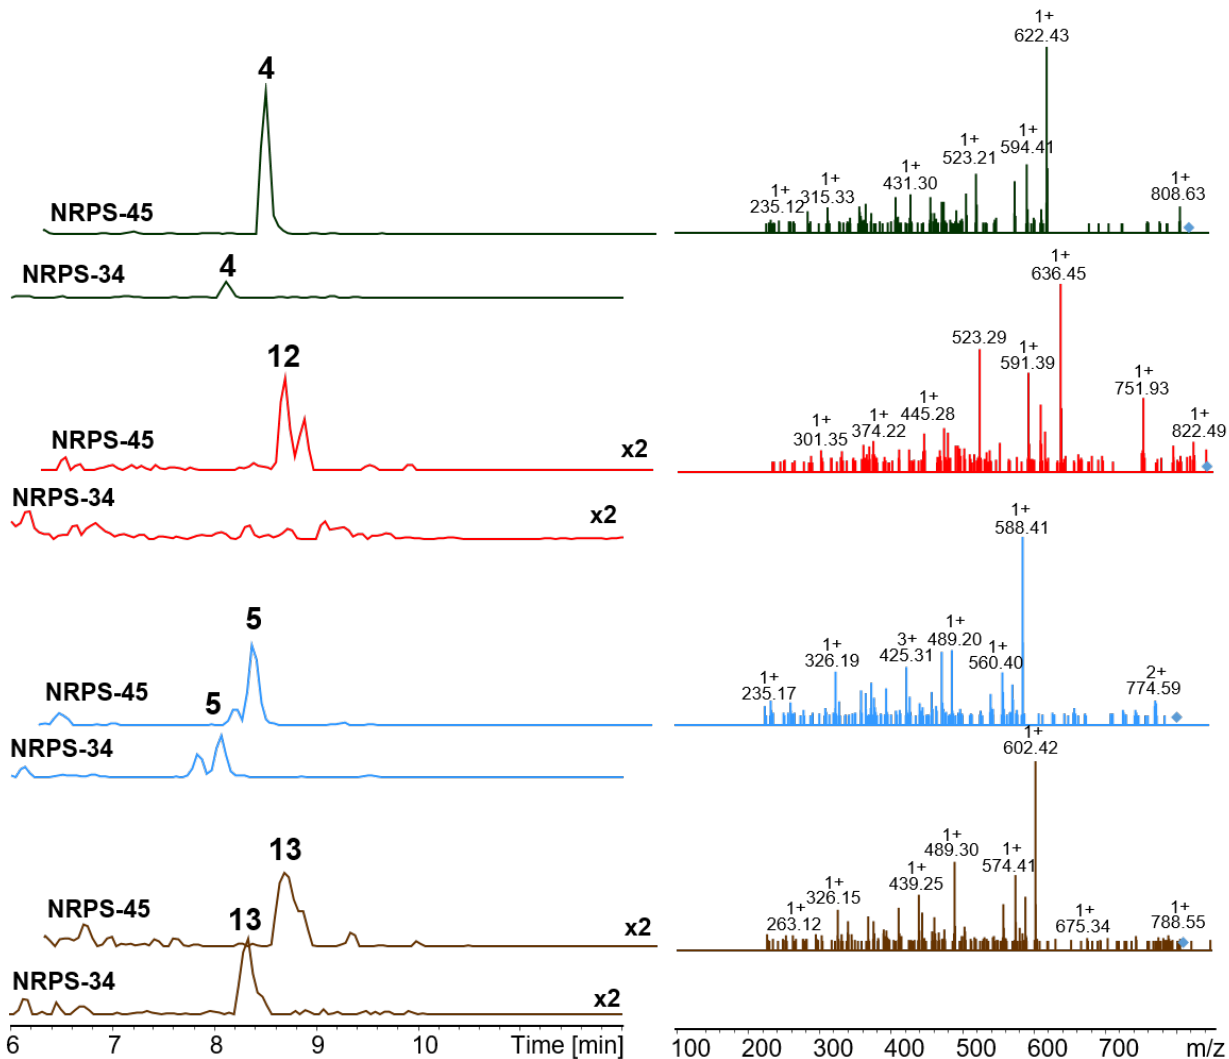

195  
 196 Figure S16. HPLC/MS data (Figure 5) of compounds 4, 12, 5 and 13 produced in *E. coli* DH10B::mtaA.  
 197 EIC/MS<sup>2</sup> of 4 (m/z [M+H]<sup>+</sup> = 826.45), 12 (m/z [M+H]<sup>+</sup> = 840.47), 5 (m/z [M+H]<sup>+</sup> = 792.47) and 13 m/z [M+H]<sup>+</sup>  
 198 = 806.48) produced by NRPS-45. EIC of 2, 12, 5 and 13 produced by NRPS-34.

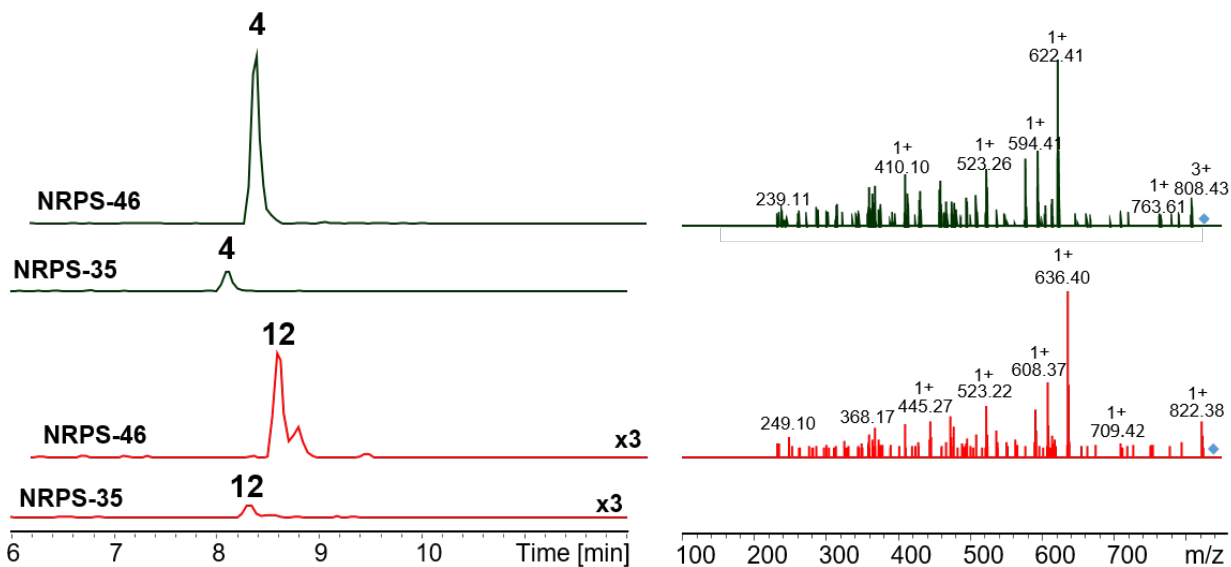

199

200 **Figure S17. HPLC/MS data (Figure 5) of compounds 4 and 12 produced in *E. coli* DH10B::*mtaA*.**  
 201 EIC/MS<sup>2</sup> of 4 (m/z [M+H]<sup>+</sup> = 826.45) and 12 (m/z [M+H]<sup>+</sup> = 840.47) produced by NRPS-46. EIC of 4 and  
 202 12 produced by NRPS-35.  
 203

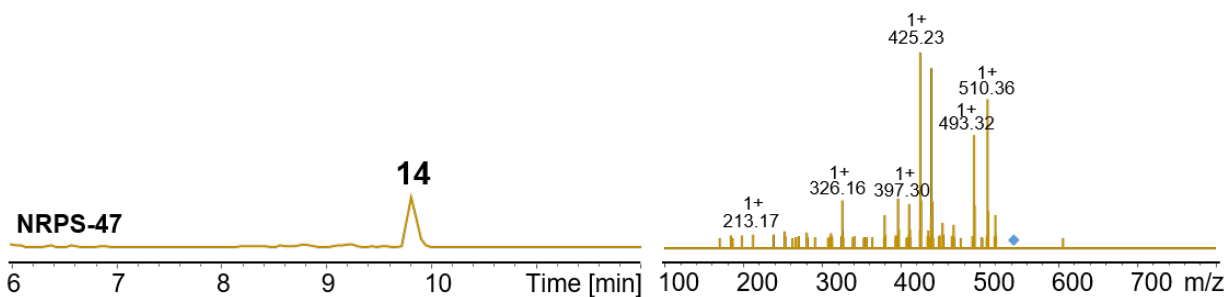

204

205 **Figure S18. HPLC/MS data (Figure 6) of compound 14 produced in *E. coli* DH10B::*mtaA*.** EIC/MS<sup>2</sup> of  
 206 14 (m/z [M+H]<sup>+</sup> = 538.40) produced by NRPS-47.  
 207



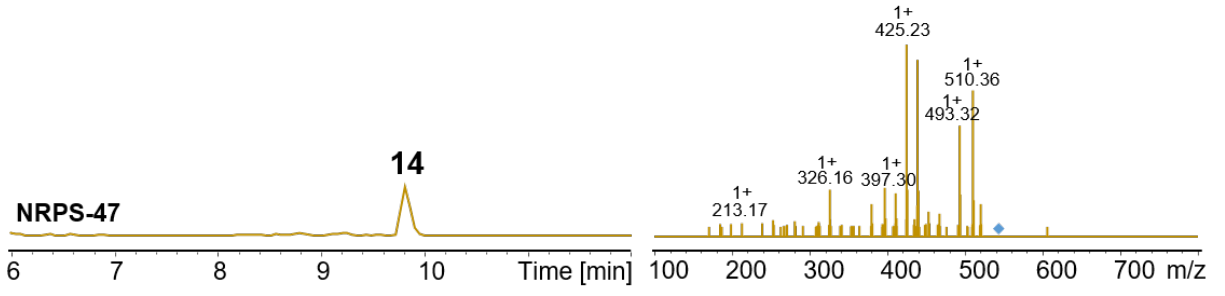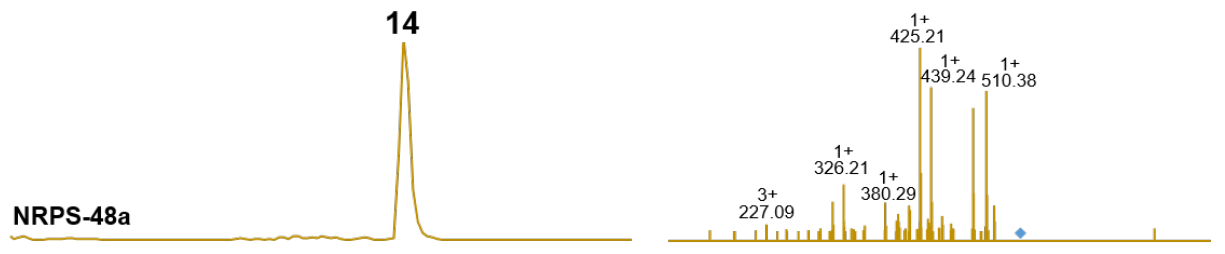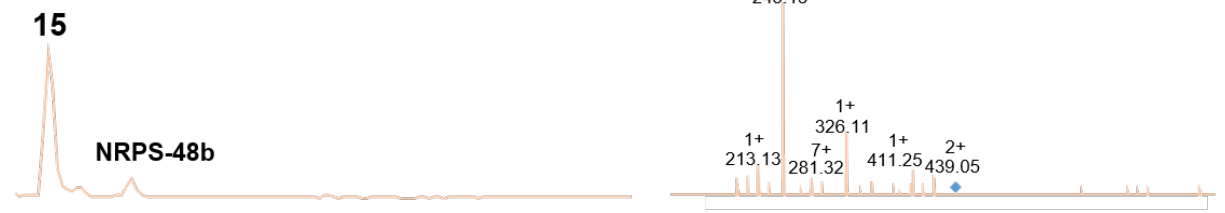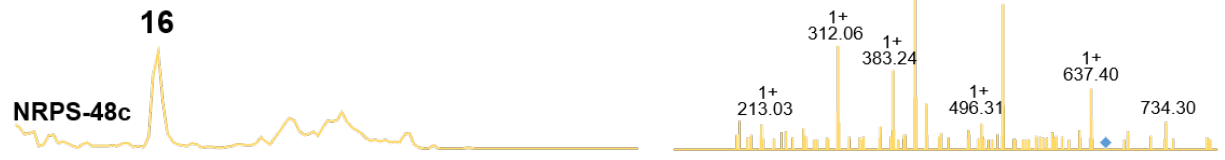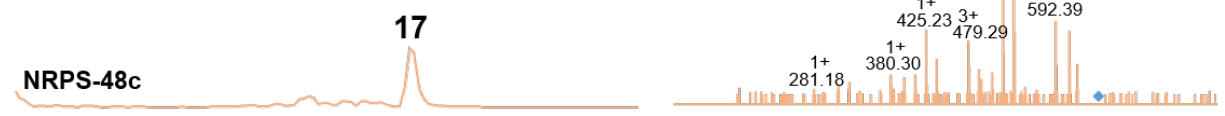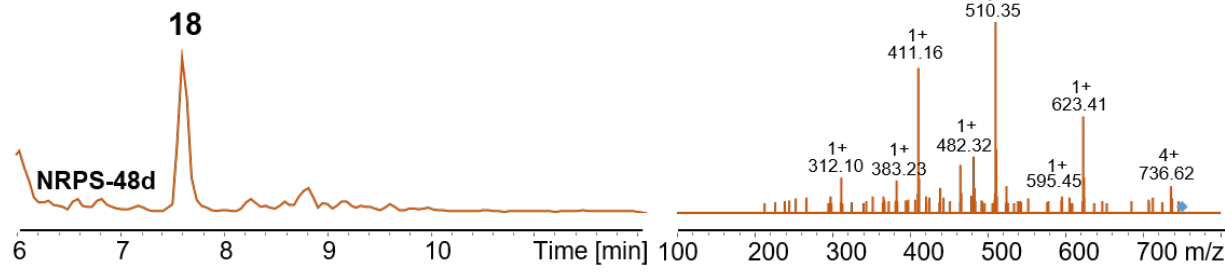

209 **Figure S19. HPLC/MS data (Figure 5) of compounds 14, 15, 16, 17 and 18 produced in *E. coli***  
210 **DH10B::*mtaA*.** EIC/MS<sup>2</sup> of 14 (m/z [M+H]<sup>+</sup> = 538.40) produced by NRPS-47 and -48a. EIC/MS<sup>2</sup> of 15 (m/z  
211 [M+H]<sup>+</sup> = 470.35) produced by NRPS-47. EIC/MS<sup>2</sup> of 16 (m/z [M+H]<sup>+</sup> = 655.47) produced by NRPS-48c.  
212 EIC/MS<sup>2</sup> of 17 (m/z [M+7]<sup>+</sup> = 637.46) produced by NRPS-48c. EIC/MS<sup>2</sup> of 18 m/z [M+H]<sup>+</sup> = 754.54)  
213 produced by NRPS-48d.  
214

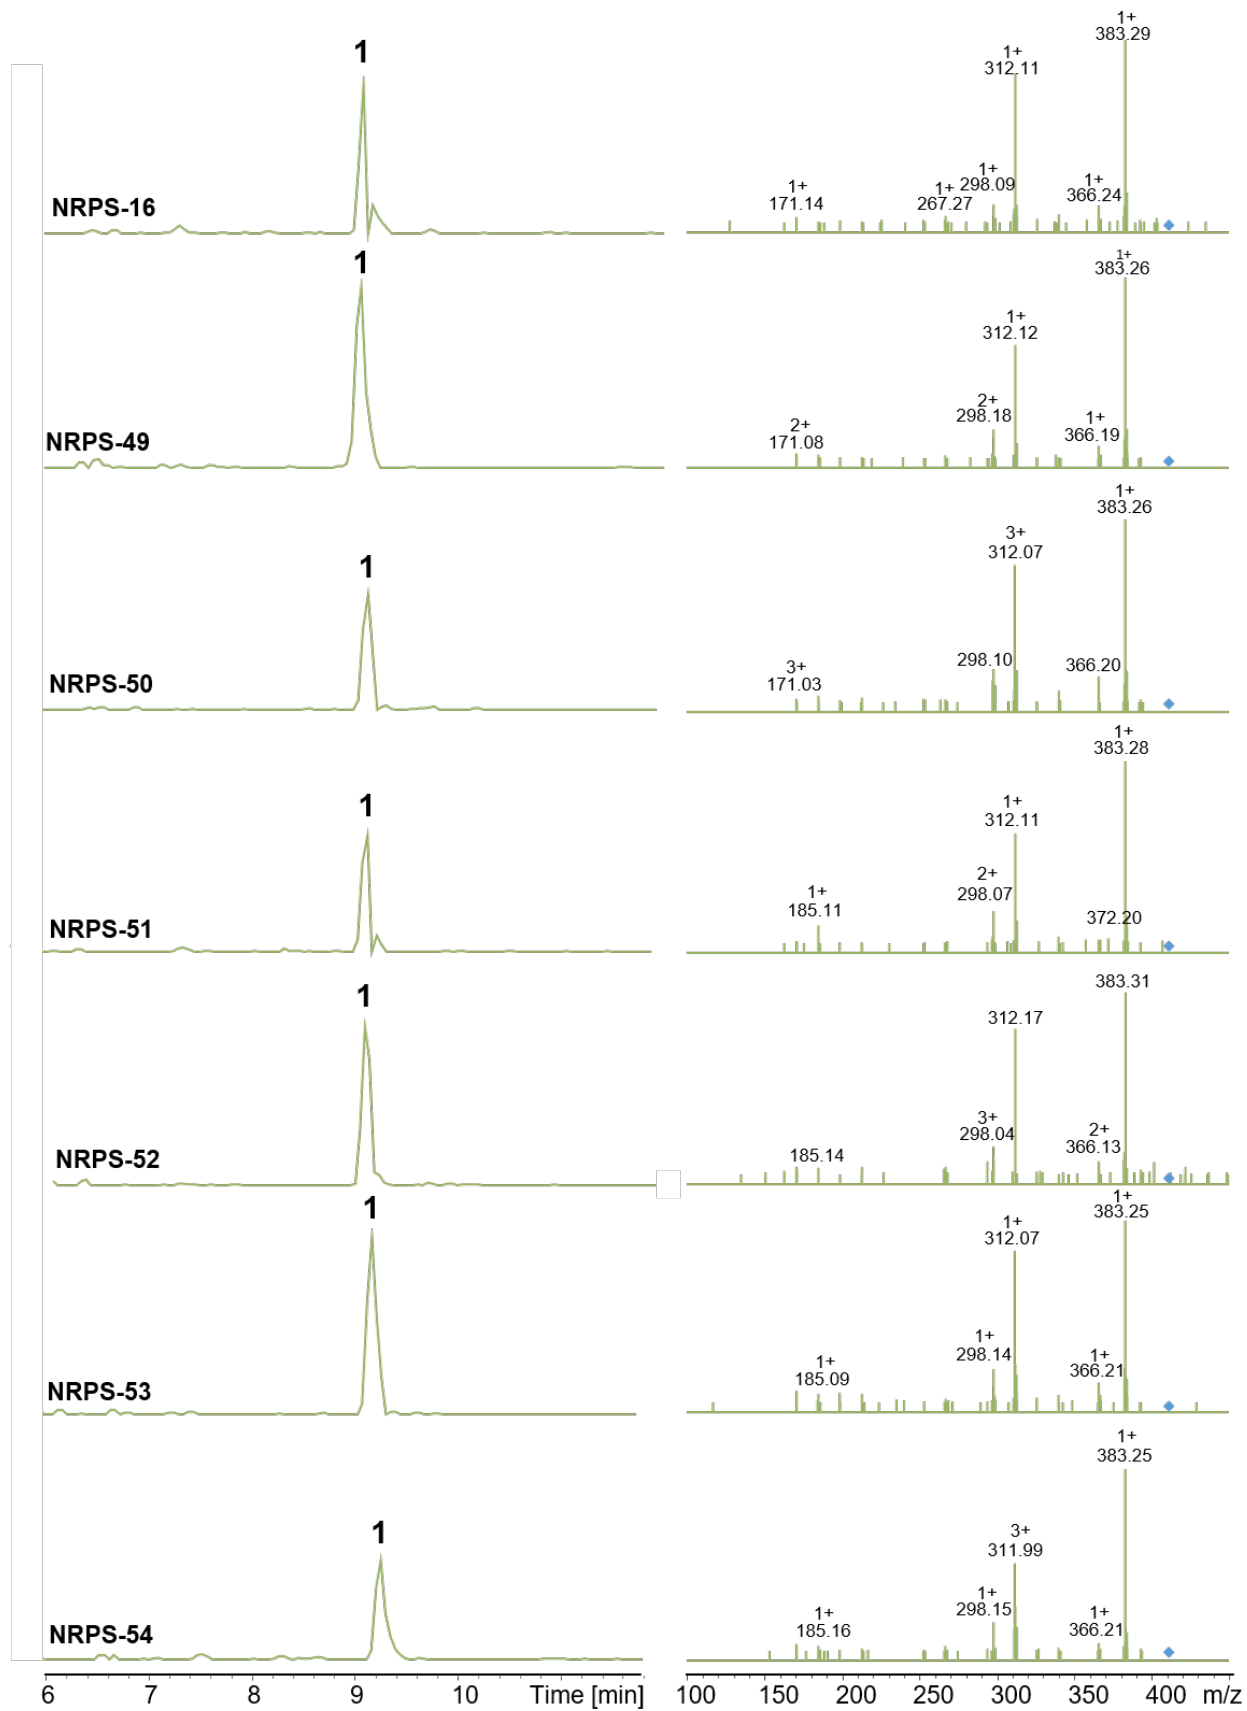

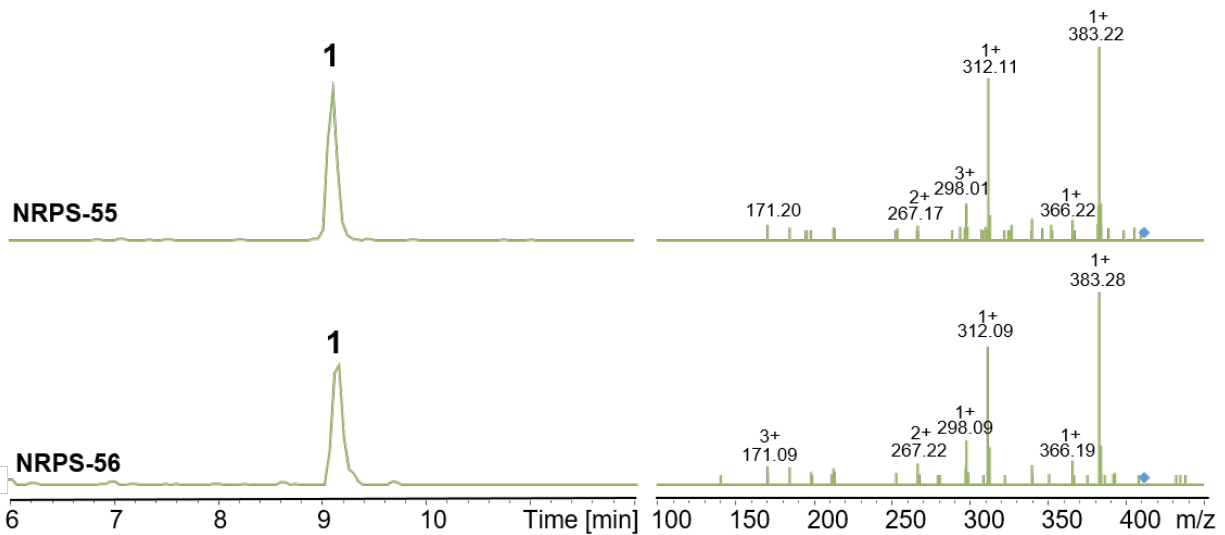

216

217 **Figure S20. HPLC/MS data (Figure S25) of compound 1 produced in *E. coli* DH10B::*mtaA*. EIC/MS<sup>2</sup>**  
 218 of 1 ( $m/z$   $[M+H]^+ = 411.29$ ) produced by NRPS-16 and NRPS-49 to -56.

219

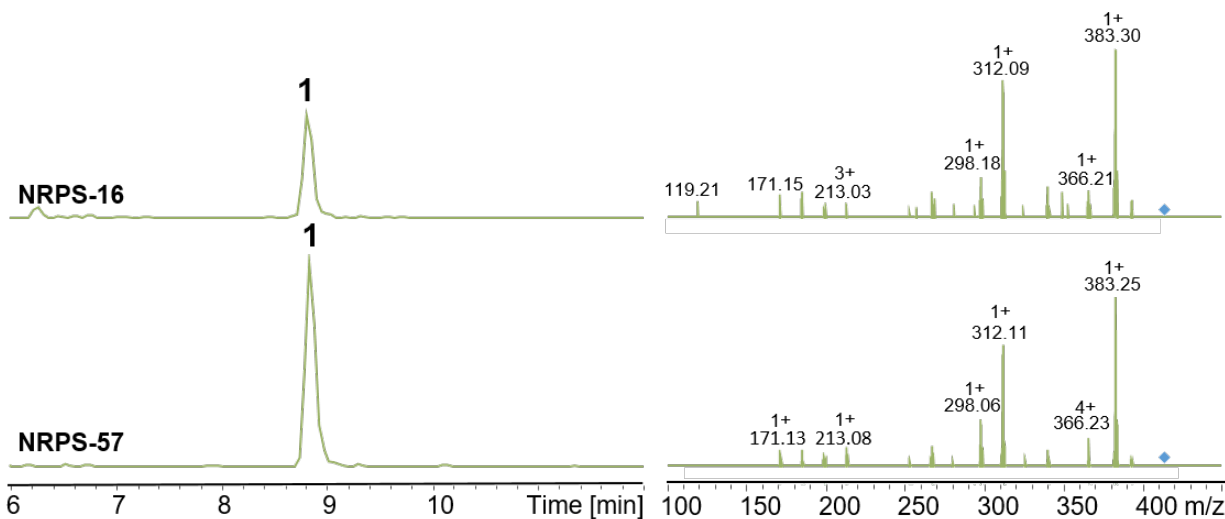

220

221 **Figure S21. HPLC/MS data (Figure S26) of compound 1 produced in *E. coli* DH10B::*mtaA*. EIC/MS<sup>2</sup>**  
 222 of 1 ( $m/z$   $[M+H]^+ = 411.29$ ) produced by NRPS-16 and NRPS-57.

223

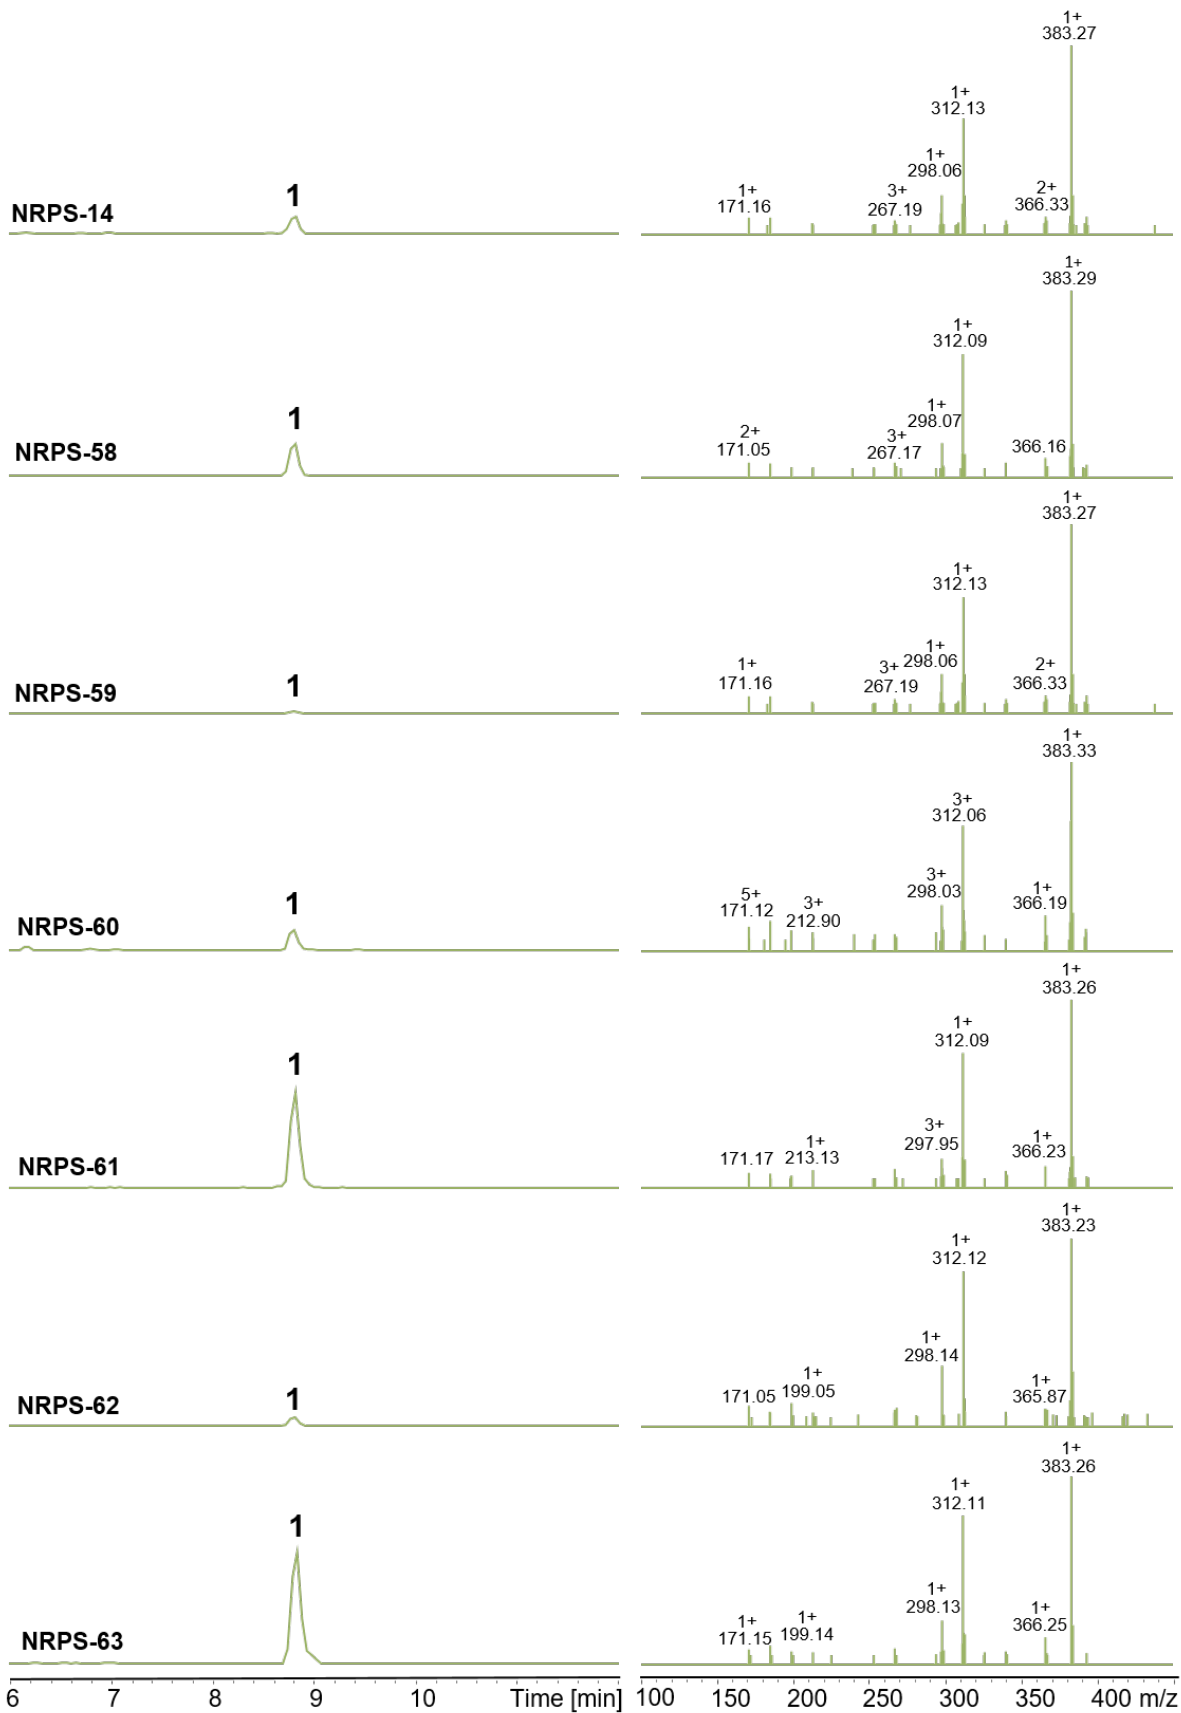

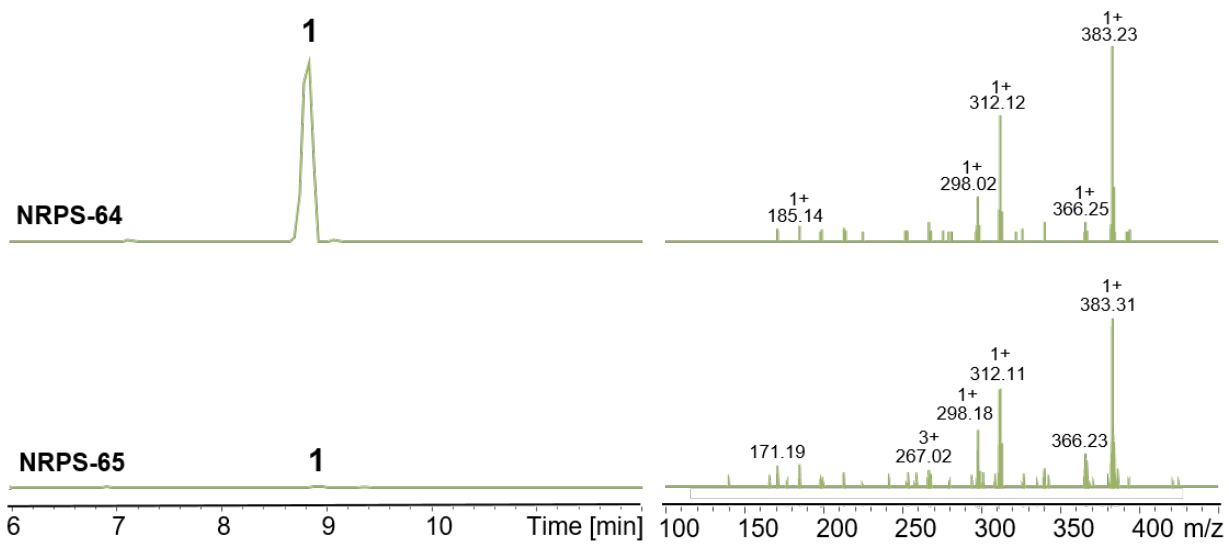

225

226

227

228

**Figure S22. HPLC/MS data (Figure S27) of compound 1 produced in *E. coli* DH10B::*mtaA*. EIC/MS<sup>2</sup> of 1 ( $m/z$   $[M+H]^+$  = 411.29) produced by NRPS-14 and NRPS-58 to NRPS-65.**

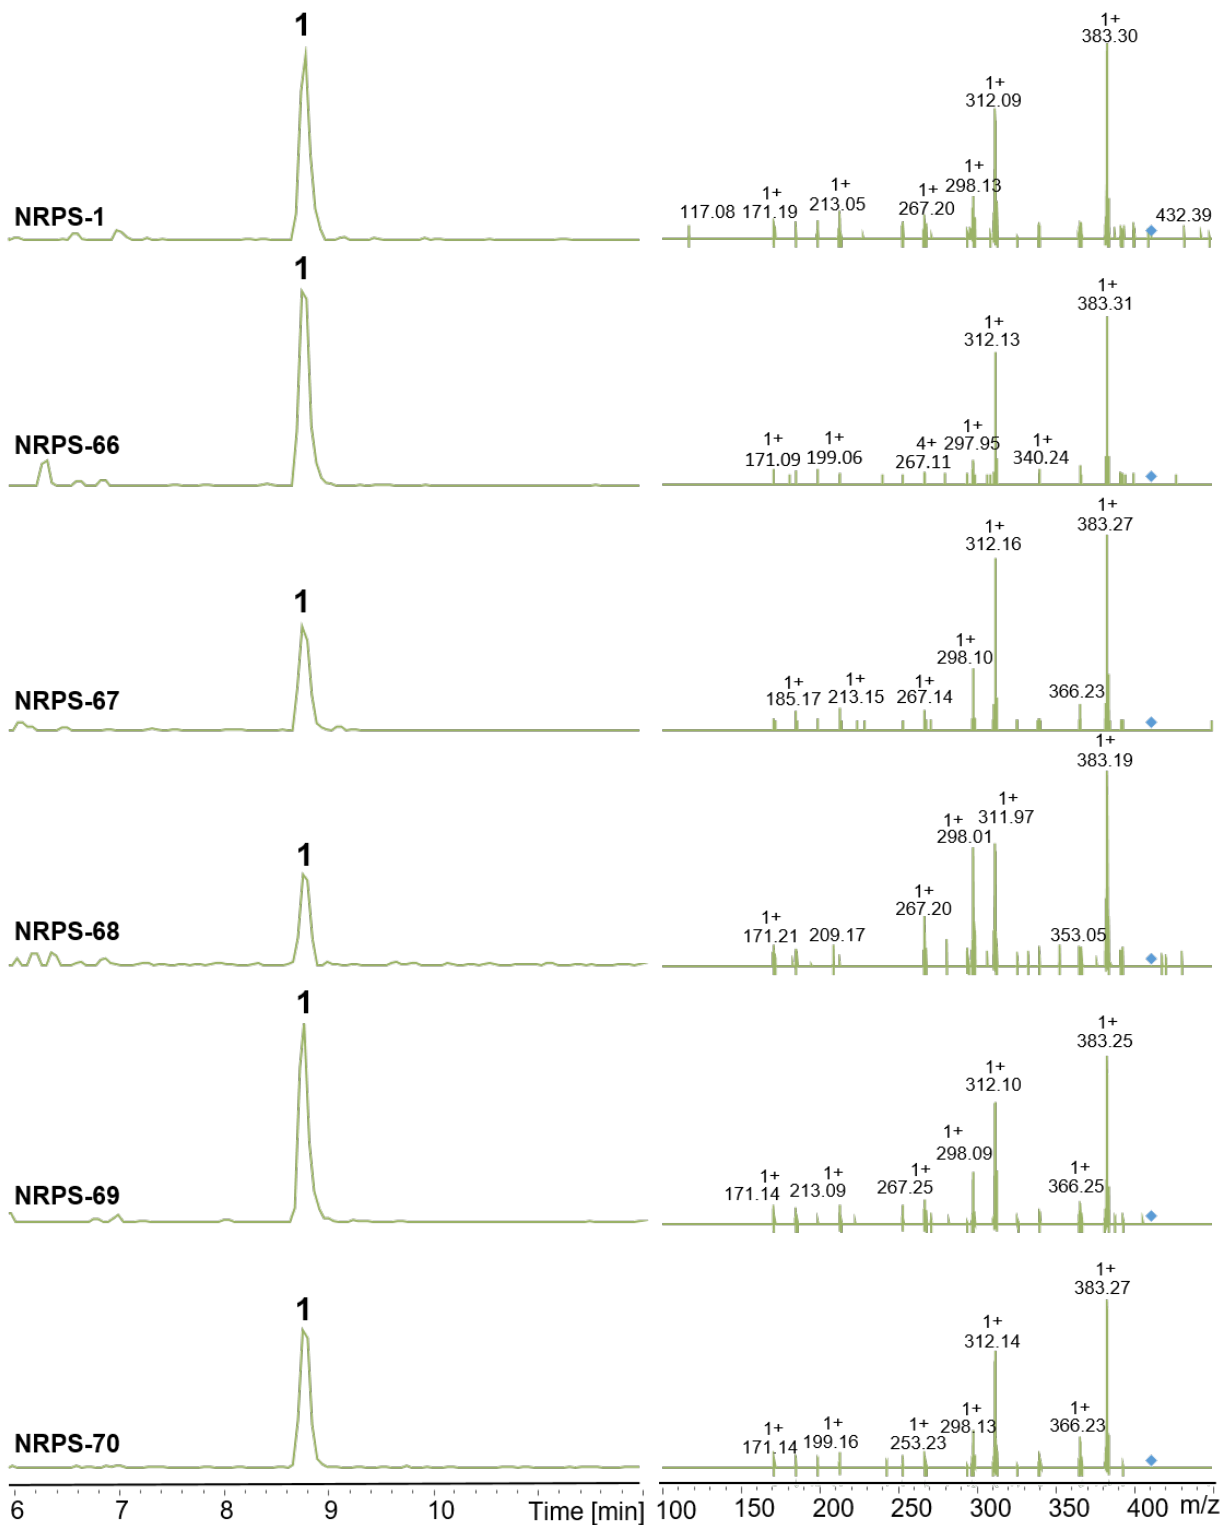

229

230

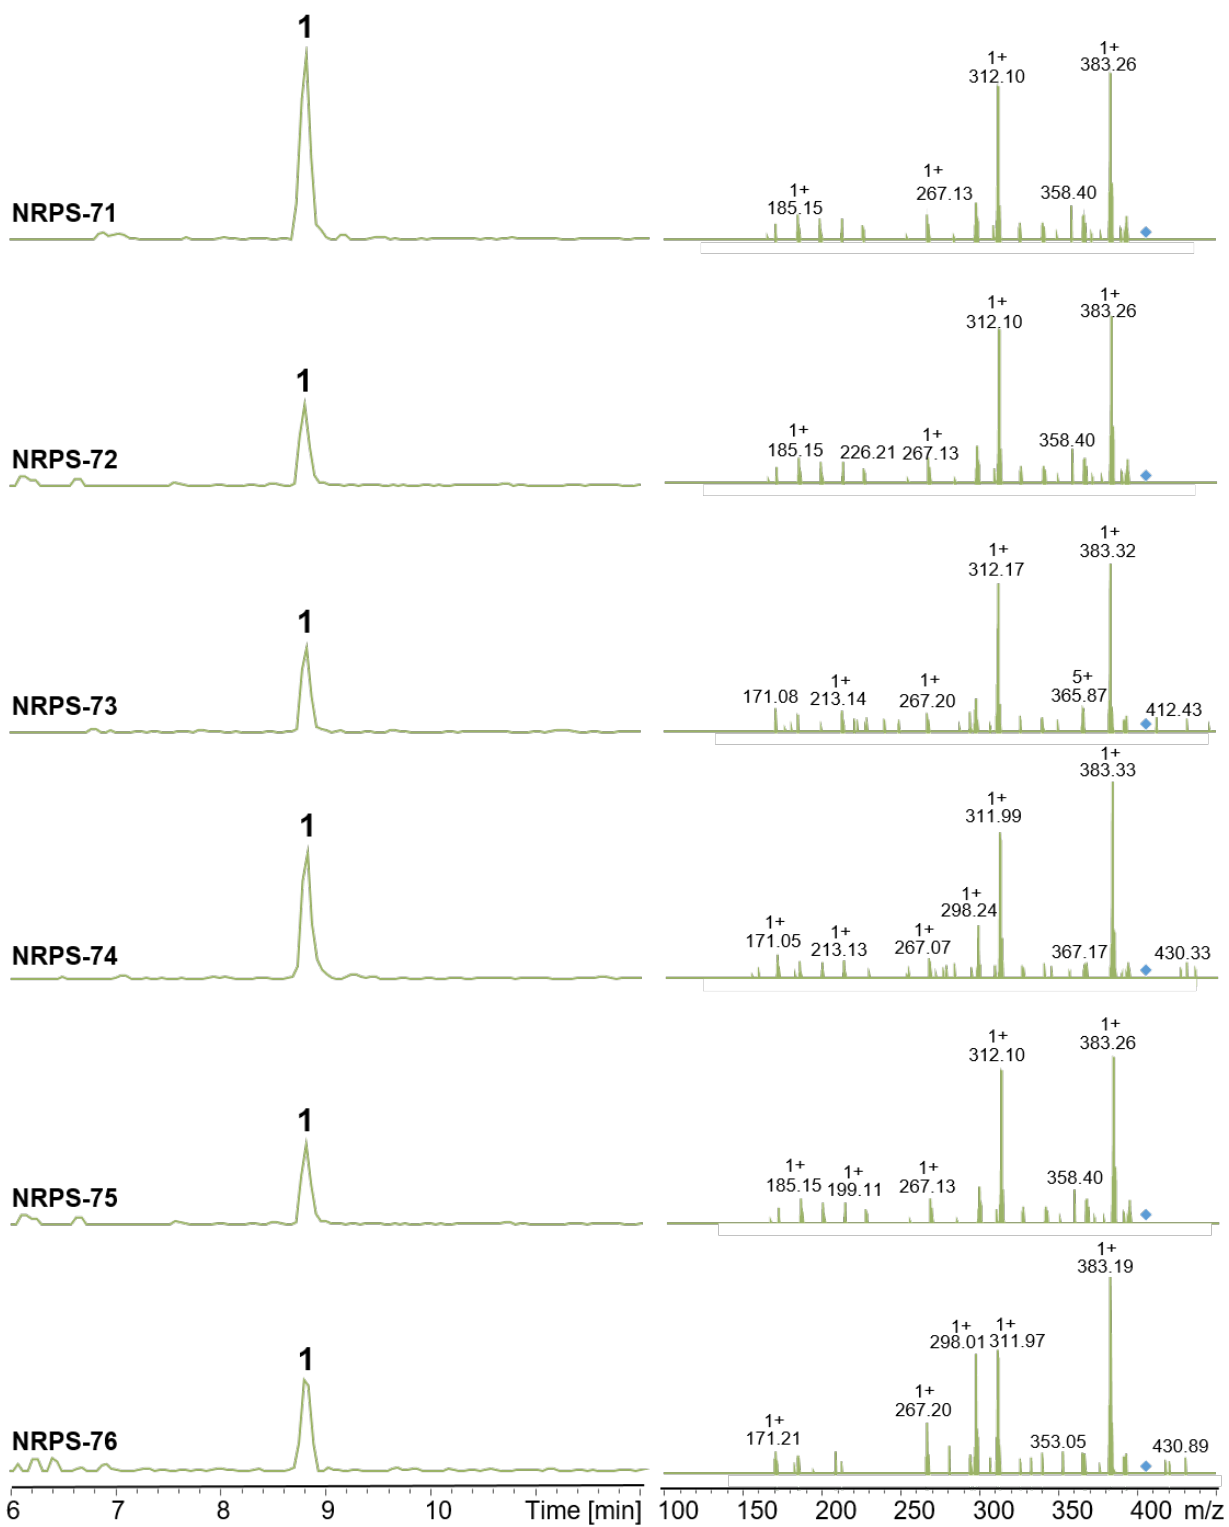

231

232



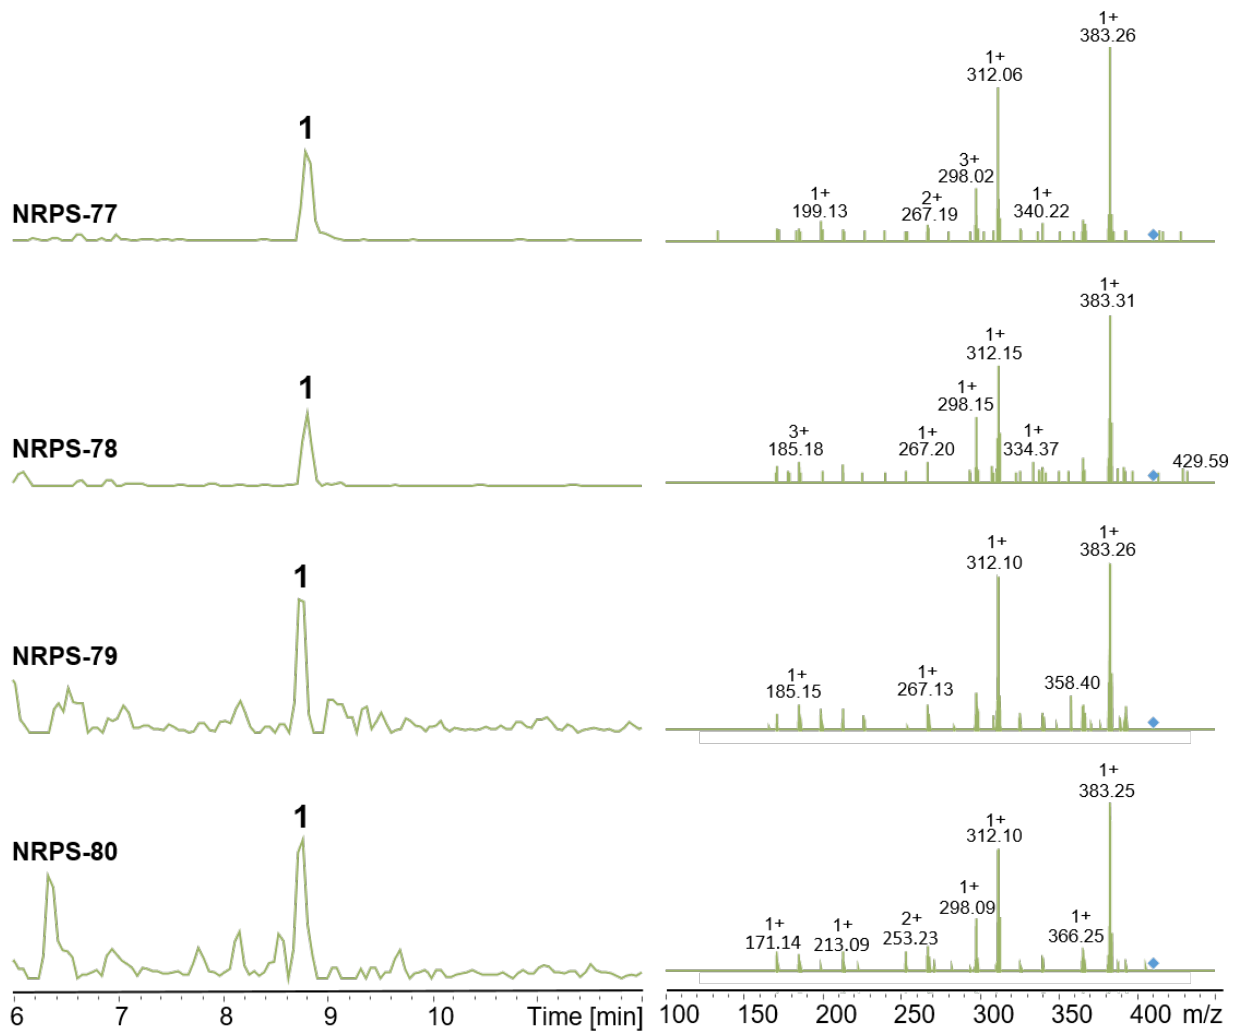

233

234 **Figure S23. HPLC/MS data (Figure S28) of compound 1 produced in *E. coli* DH10B::*mtaA*. EIC/MS<sup>2</sup>**  
 235 **of 1 ( $m/z$   $[M+H]^+ = 411.29$ ) produced by NRPS-1 and NRPS-66 to NRPS-80.**

236

237

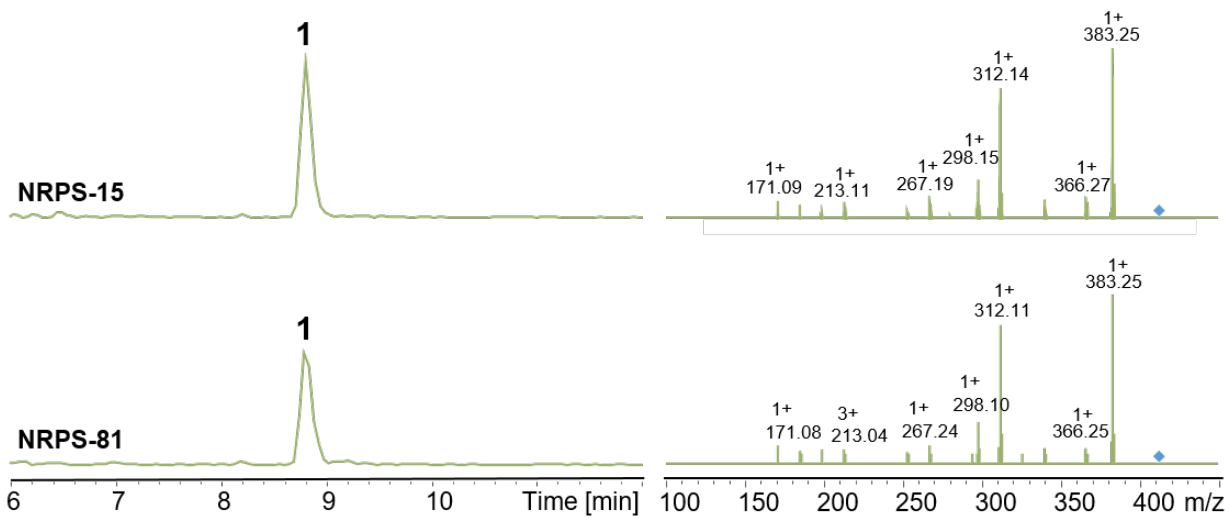

238

239 **Figure S24. HPLC/MS data (Figure S29) of compound 1 produced in *E. coli* DH10B::*mtaA*. EIC/MS<sup>2</sup>**  
 240 **of 1 ( $m/z$   $[M+H]^+$  = 411.29) produced by NRPS-15 and NRPS-81.**

241

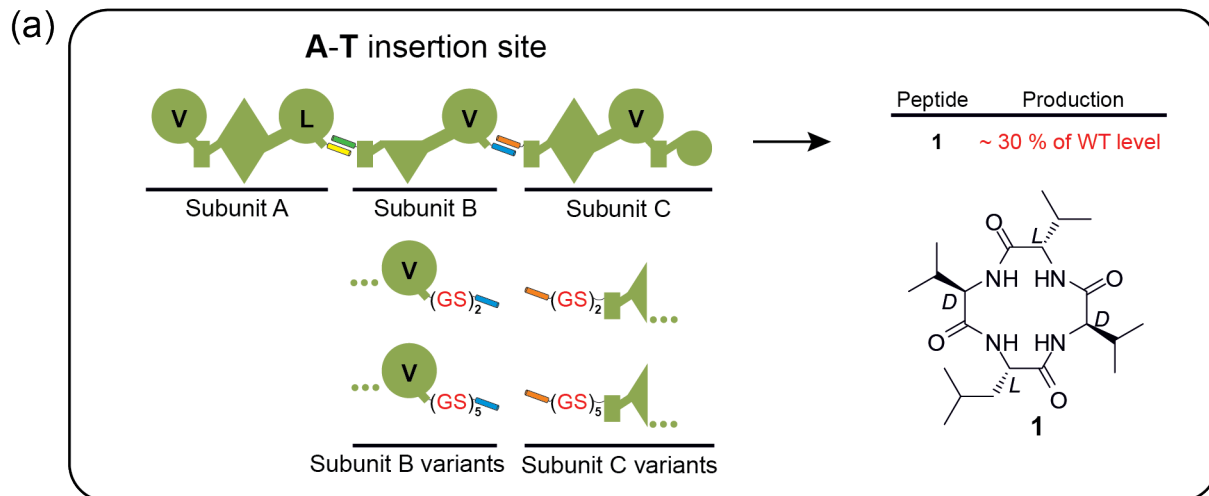

(b) Recombination and transformation into *E. coli* DH10B::MtaA

|         | Production (mg l <sup>-1</sup> ) | % of WT level | Optimization |
|---------|----------------------------------|---------------|--------------|
| NRPS-16 | 28.2 ± 6.4                       | 36.7          |              |
| NRPS-49 | 29.3 ± 7.0                       | 38.0          | O            |
| NRPS-50 | 36.0 ± 2.6                       | 46.7          | +            |
| NRPS-51 | 24.1 ± 8.9                       | 31.3          | O            |
| NRPS-52 | 30.3 ± 5.6                       | 39.4          | O            |
| NRPS-53 | 34.4 ± 5.3                       | 44.6          | +            |
| NRPS-54 | 26.8 ± 6.6                       | 34.8          | O            |
| NRPS-55 | 34.1 ± 2.0                       | 44.2          | O            |
| NRPS-56 | 40.0 ± 7.7                       | 52.0          | +            |

● XtpS   
 ▬ SZ17   
 ▬ SZ18   
 ▬ SZ1   
 ▬ SZ2   
 ◀ C   
 ◀ C/E   
 ● A   
 ▬ T   
 ▬ TE

243 **Figure S25. More GS-optimized chimeric tri-partite XtpS NRPSs split at the A-T position.** (a) Between  
 244 each experimental approach, the production of non-optimized NRPS-16 varies, but is on average at ~30%  
 245 of WT level. A set of modified subunit B and C variants were constructed by inserting GS stretches of  
 246 varying length (4 AAs or 10 AAs) between subunit 2 and SZ1 and subunit 3 and SZ2. (b) Generated  
 247 modified subunits were re-combined with non-modified subunits and transformed into *E. coli* DH10B::*MtaA*  
 248 to obtain NRPS-49 to -56. Production titres of NRPS-49 to -56 were compared with each other and rated  
 249 with from –, --, --- to O, +, ++, +++. Corresponding peptide yields (mg/L) and standard deviations are  
 250 obtained from biological triplicate experiments. For domain assignment, the following symbols are used:  
 251 (A, large circles), (T, rectangle), (C, triangle), (C/E, diamond), (TE, small circle); substrate specificities are  
 252 assigned for all A domains and indicated by capital letters.  
 253  
 254

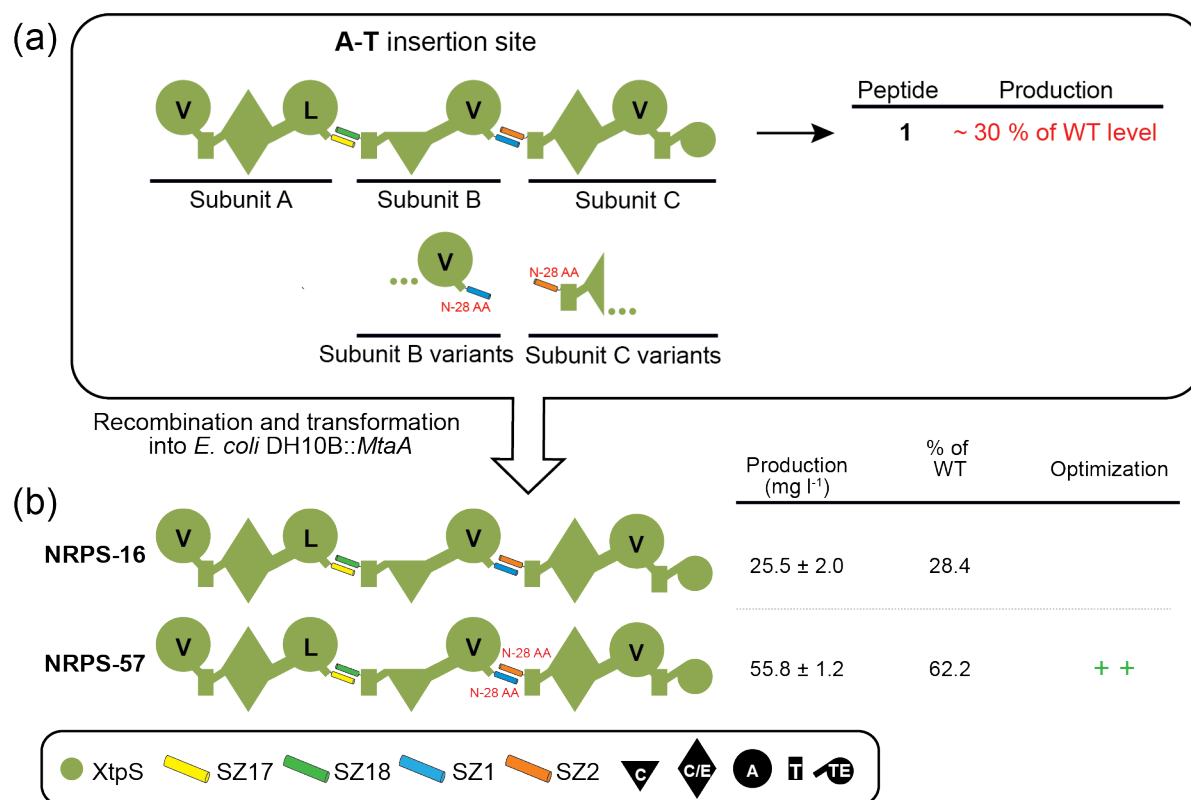

255  
 256 **Figure S26. SZ1:2 truncation of chimeric di-partite XtpS NRPSs split at the A-T position.** (a) Between  
 257 each experimental approach, the production of non-optimized NRPS-16 varies, but is on average at ~30%  
 258 of WT level. Subunit B and C variants were N-terminally truncated by 28 AA, respectively. (b) Generated  
 259 modified subunits were re-combined with non-modified subunits and transformed into *E. coli* DH10B::*MtaA*  
 260 to obtain NRPS-16 and -57. Corresponding peptide yields (mg/L) and standard deviations are obtained from  
 261 biological triplicate experiments. Rating of production titres and domain assignment is as described before.  
 262

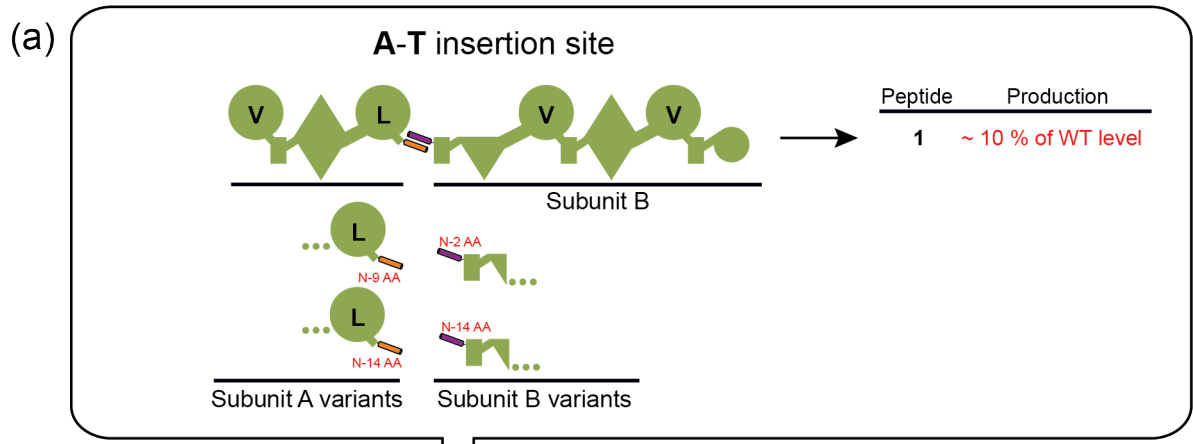

Recombination and transformation into *E. coli* DH10B::MtaA

(b)

| NRPS    | Production (mg l <sup>-1</sup> ) | % of WT level | Optimization |
|---------|----------------------------------|---------------|--------------|
| NRPS-14 | 11.5 ± 1.5                       | 3.2           | +            |
| NRPS-58 | 20.1 ± 4.6                       | 24.0          | +            |
| NRPS-59 | 1.4 ± 0.5                        | 1.6           | -            |
| NRPS-60 | 10.4 ± 1.8                       | 11.9          | O            |
| NRPS-61 | 41.9 ± 10.1                      | 48.0          | ++           |
| NRPS-62 | 5.0 ± 1.8                        | 5.8           | -            |
| NRPS-63 | 72.5 ± 6.9                       | 83.2          | +++          |
| NRPS-64 | 101.7 ± 4.5                      | 116.8         | +++          |
| NRPS-65 | 6.6 ± 4.7                        | 7.6           | -            |

● XtpS
▬ SZ2
▬ SZ19
◀ C
◀ C/E
● A
▬ T
◀ TE

264 **Figure S27. SZ2:19 truncation of chimeric di-partite XtpS NRPSs split at the A-T position.** (a) Between  
265 each experimental approach, the production of non-optimized NRPS-14 varies, but is on average at ~10%  
266 of WT level. A set of modified subunit A and B variants were constructed by N-terminally truncating SZ2 by  
267 9 AAs and 14 AAs and SZ19 by 2 AAs and 7 AAs, respectively. (b) Generated modified subunits were re-  
268 combined with non-modified subunits and transformed into *E. coli* DH10B::MtaA to obtain NRPS-14, -59 to  
269 -66. Corresponding peptide yields (mg/L) and standard deviations are obtained from biological triplicate  
270 experiments. Rating of production titres and domain assignment is as described before.

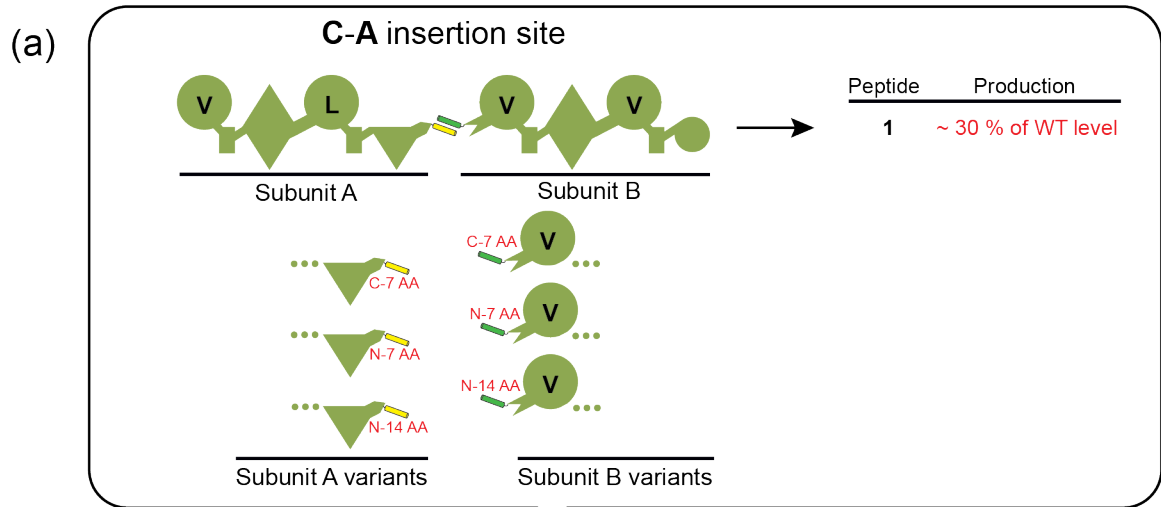

Recombination and transformation into *E. coli* DH10B::MtaA

(b)

|         |  | Production (mg l <sup>-1</sup> ) | % of WT level | Optimization |
|---------|--|----------------------------------|---------------|--------------|
| NRPS-1  |  | 24.7 ± 0.9                       | 27.6          |              |
| NRPS-66 |  | 24.5 ± 2.5                       | 27.3          | O            |
| NRPS-67 |  | 16.9 ± 1.9                       | 18.8          | -            |
| NRPS-68 |  | 11.7 ± 0.8                       | 13.0          | --           |
| NRPS-69 |  | 24.7 ± 1.5                       | 27.5          | O            |
| NRPS-70 |  | 28.0 ± 1.9                       | 31.1          | O            |
| NRPS-71 |  | 19.9 ± 1.9                       | 22.1          | -            |
| NRPS-72 |  | 7.5 ± 1.1                        | 8.3           | --           |
| NRPS-73 |  | 9.3 ± 0.3                        | 10.4          | --           |
| NRPS-74 |  | 14.6 ± 1.9                       | 16.2          | -            |

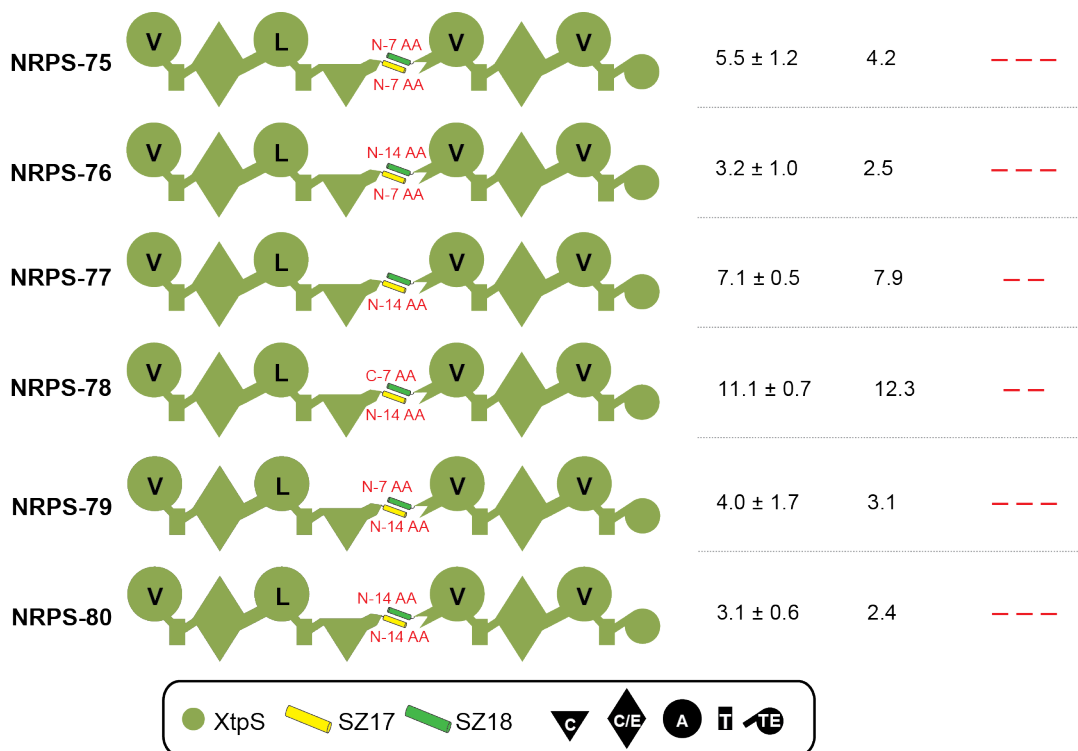

272

273 **Figure S28. SZ17:18 truncation of chimeric di-partite XtpS NRPSs split at the C-A position.** (a)  
 274 Between each experimental approach, the production of non-optimized NRPS-1 varies, but is on average  
 275 at ~30% of WT level. A set of modified subunit A and B variants were constructed by N- terminally truncating  
 276 SZ17 and SZ18 by 7 AAs and 14 AAs, respectively and C-terminally truncating SZ17 and SZ18 by 7 AAs.  
 277 (b) Generated modified subunits were re-combined with non-modified subunits and transformed into E. coli  
 278 DH10B::MtaA to obtain NRPS-1, -67 to -81. Corresponding peptide yields (mg/L) and standard deviations  
 279 are obtained from biological triplicate experiments. Rating of production titres and domain assignment is as  
 280 described before.  
 281



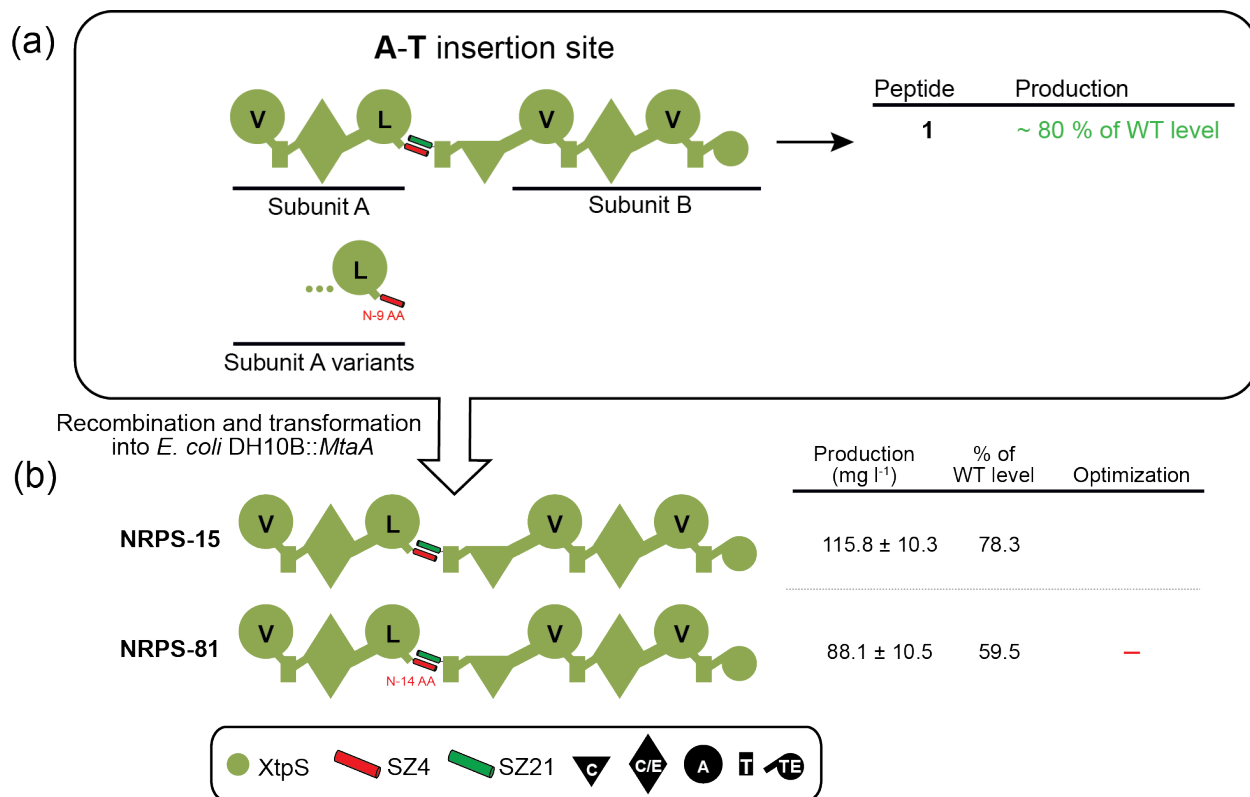

282

283 **Figure S29. SZ4:21 truncation of chimeric di-partite XtpS NRPSs split at the A-T position.** (a) Between  
 284 each experimental approach, the production of non-optimized NRPS-15 varies, but is on average at ~30%  
 285 of WT level. Modified subunit A was constructed by N-terminally truncating SZ4 by 14 AAs. (b) Generated  
 286 modified subunits were re-combined with non-modified subunits and transformed into *E. coli* DH10B::*MtaA*  
 287 to obtain NRPS-1, -67 to -81. Corresponding peptide yields (mg/L) and standard deviations are obtained  
 288 from biological triplicate experiments. Rating of production titres and domain assignment is as described  
 289 before.

290

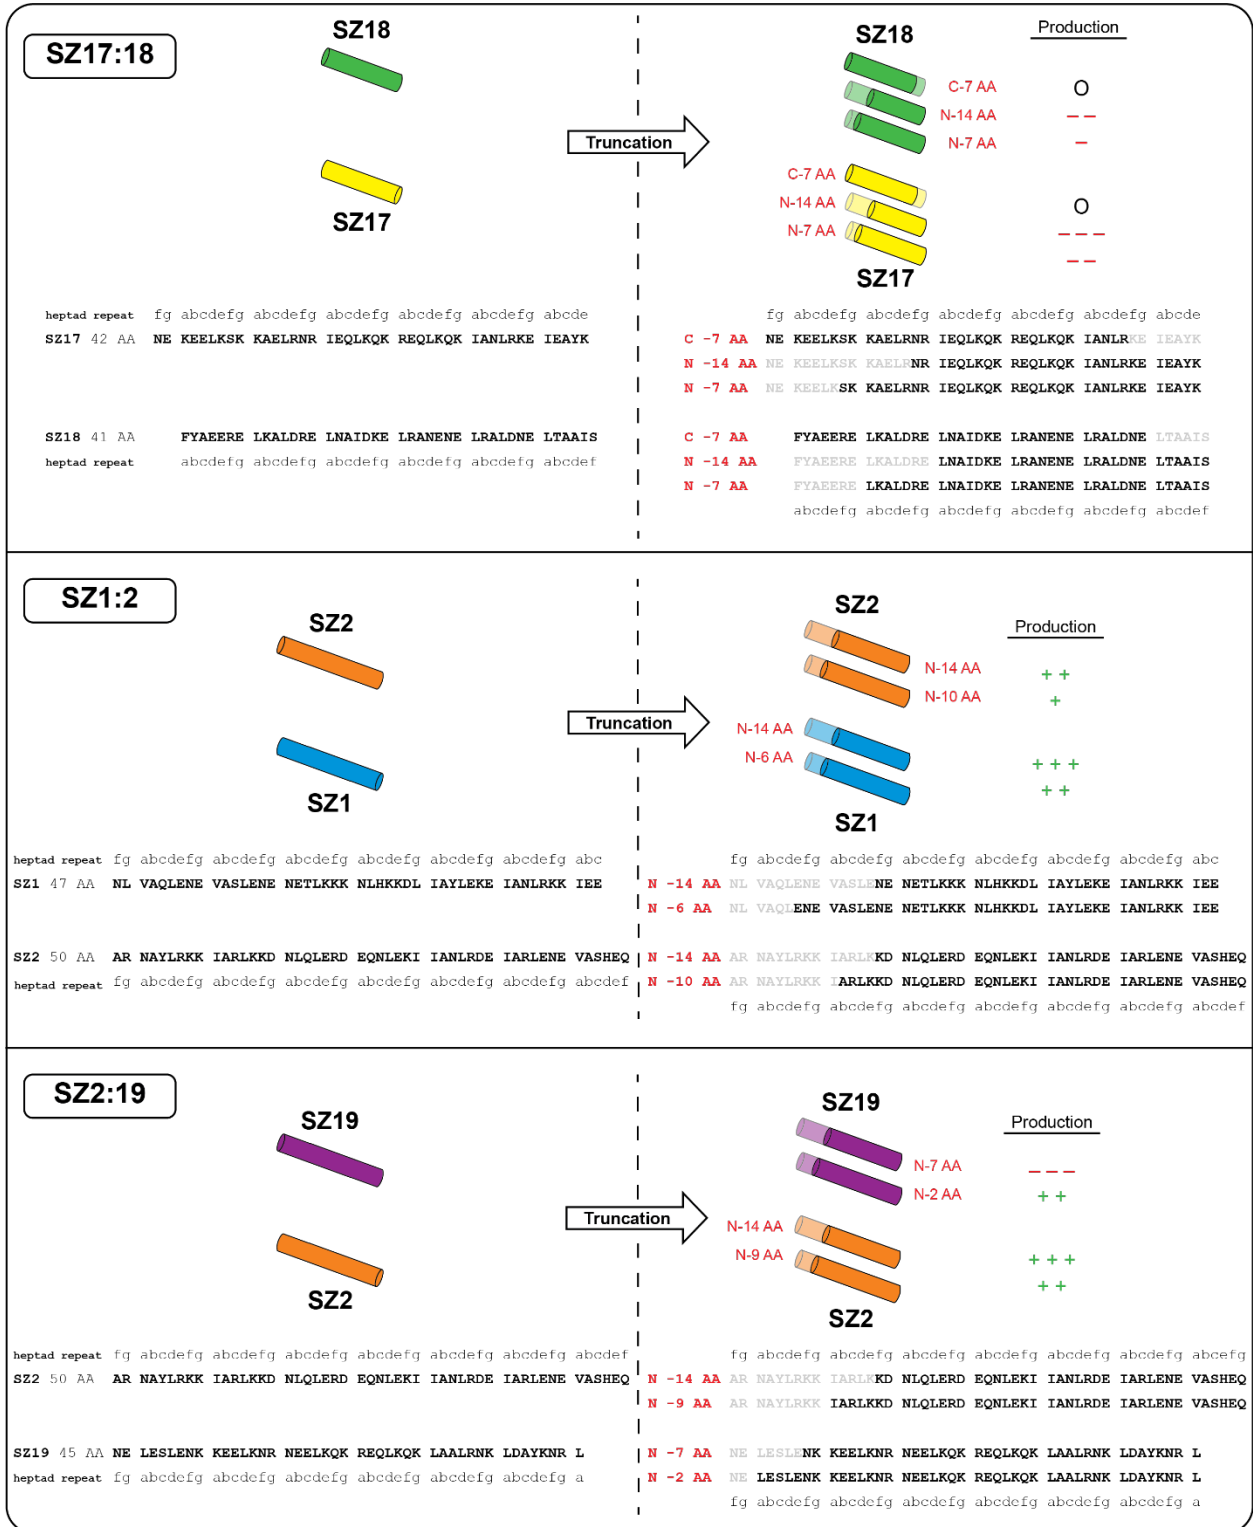

Supplement: sb3c00295_si_001.pdf [file sb3c00295_si_001.pdf]
